# Supplementary material for: Dimeric and trimeric derivatives of the azinomycin B chromophore show enhanced DNA binding
Source: Royal Society of Chemistry journal article supplement (doi:10.1039/c7ob00944e), 2017-01-01
Supplement: c7ob00944e2.pdf [file c7ob00944e2.pdf]

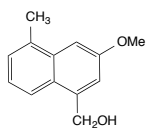

4

$^1\text{H}$  NMR (400 MHz,  $\text{CDCl}_3$ )

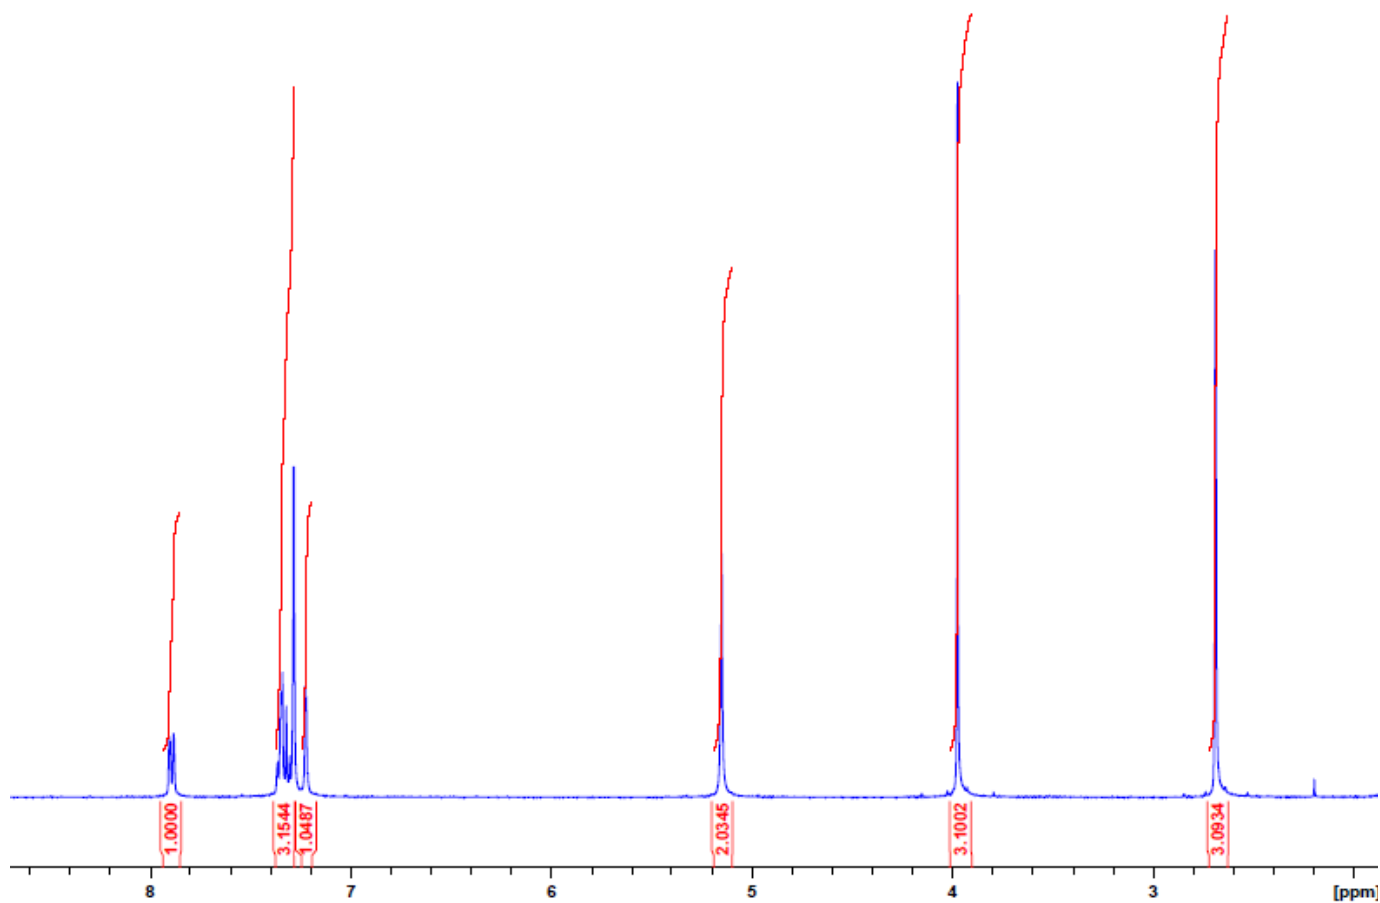

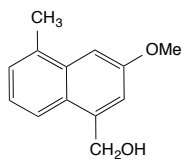

4

$^{13}\text{C}$  NMR (100 MHz,  $\text{CDCl}_3$ )

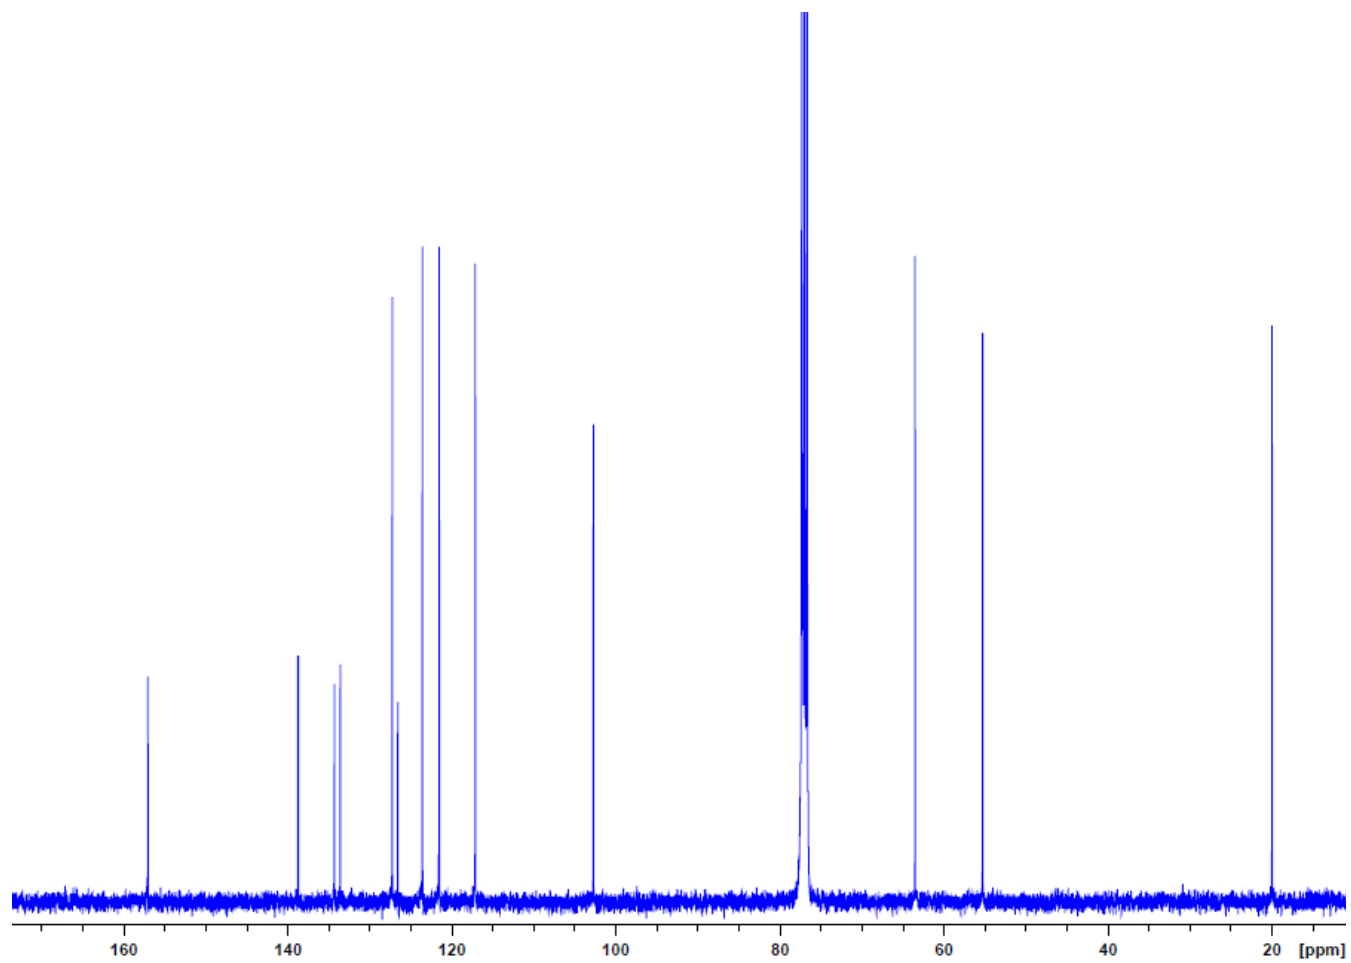

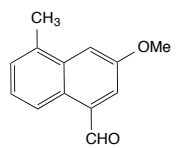

5

$^1\text{H}$  NMR (400 MHz,  $\text{CDCl}_3$ )

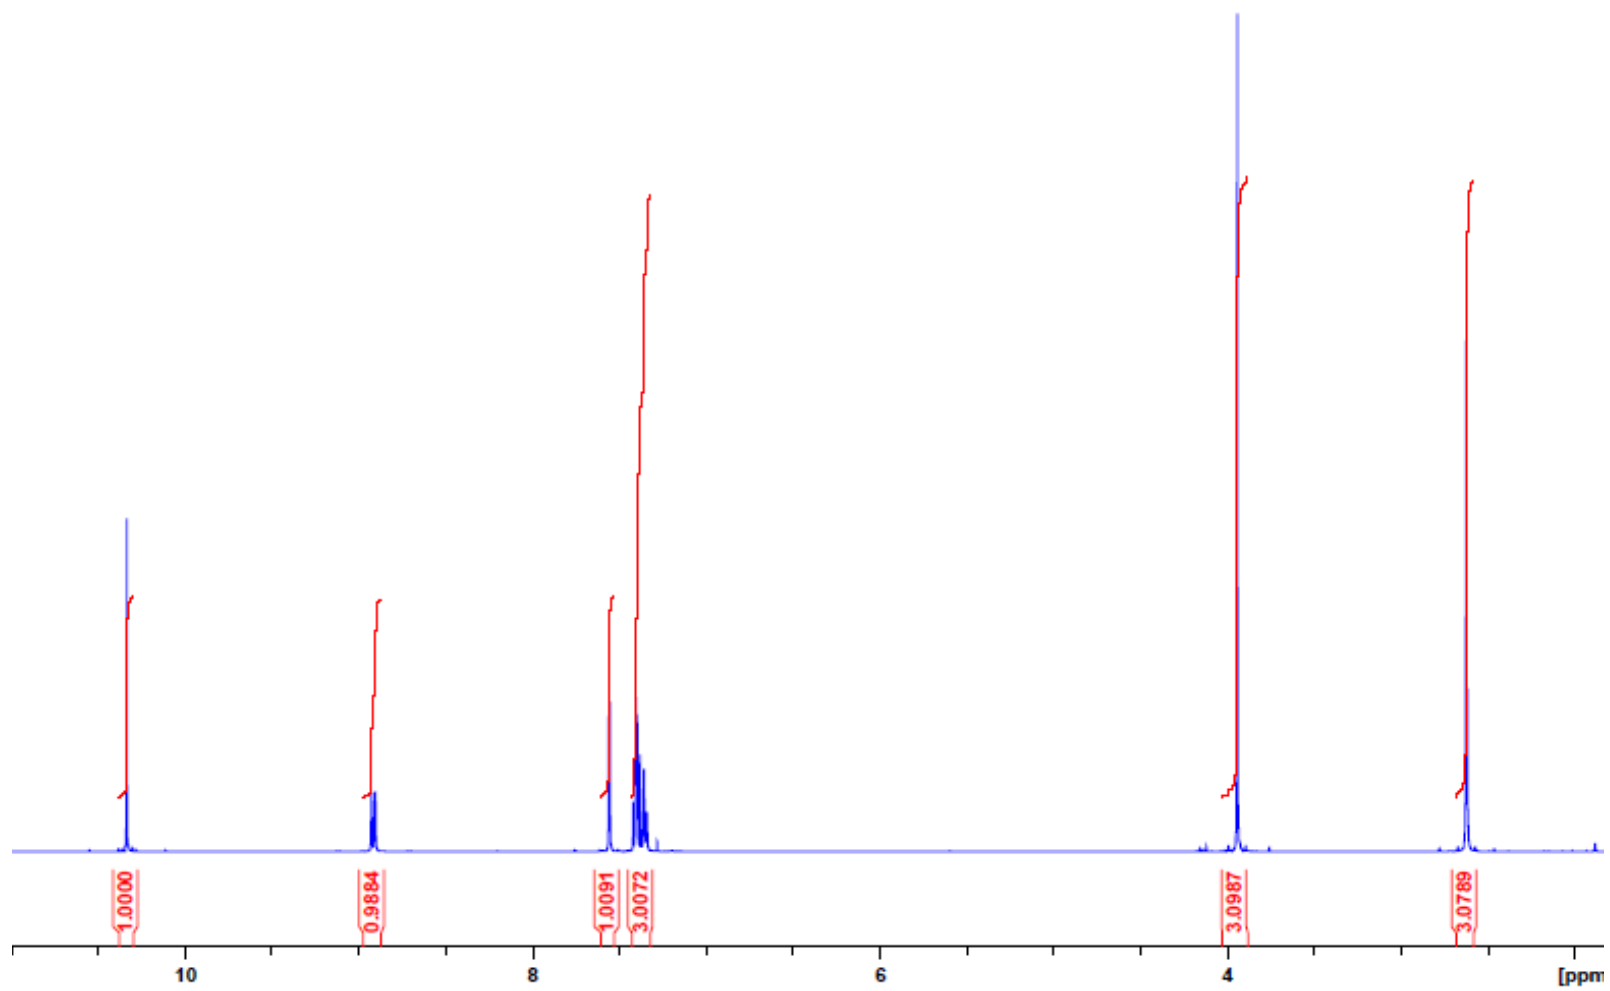

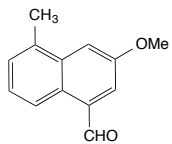

5

$^{13}\text{C}$  NMR (100 MHz,  $\text{CDCl}_3$ )

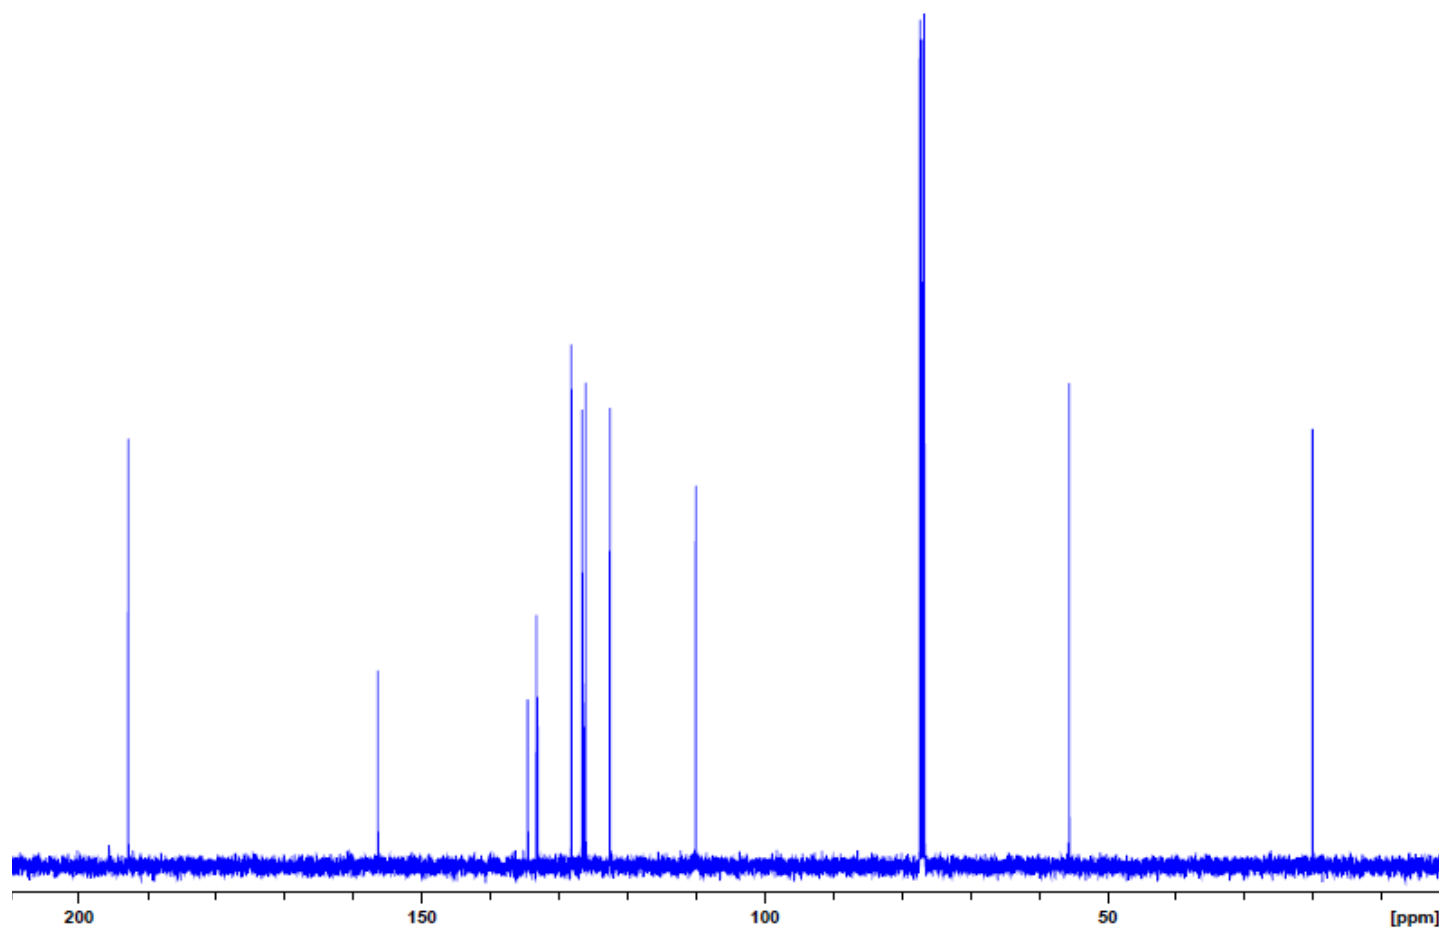

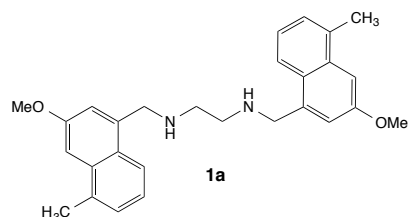

$^1\text{H}$  NMR (400 MHz,  $\text{CDCl}_3$ )

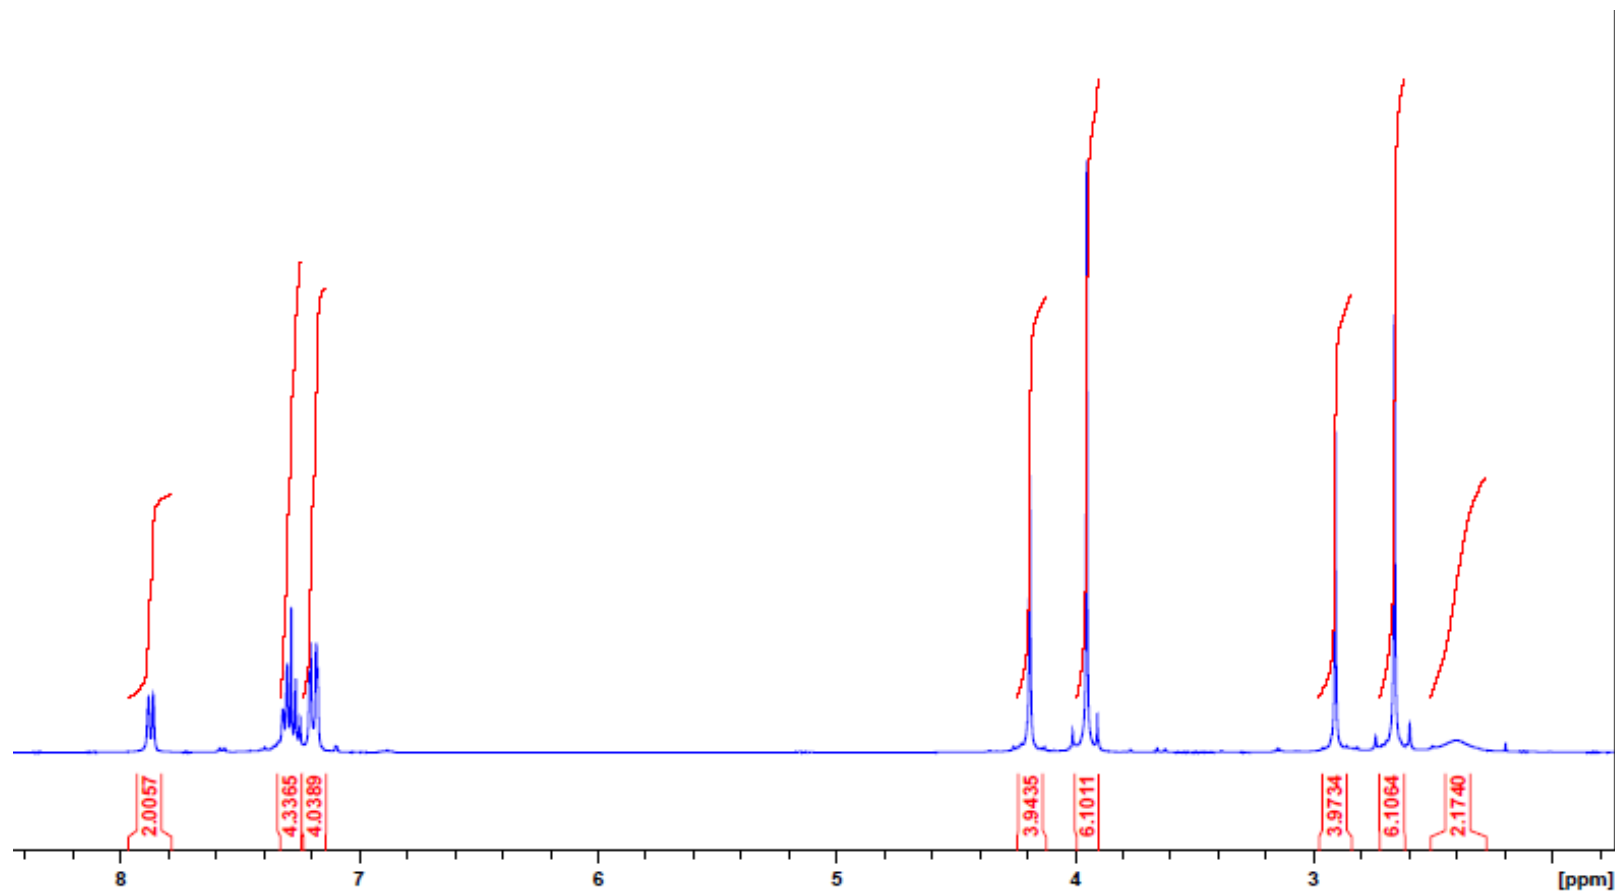

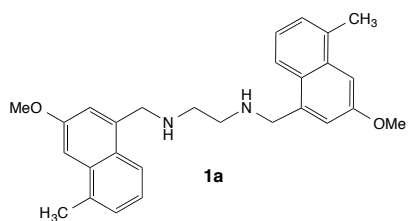

$^{13}\text{C}$  NMR (100 MHz,  $\text{CDCl}_3$ )

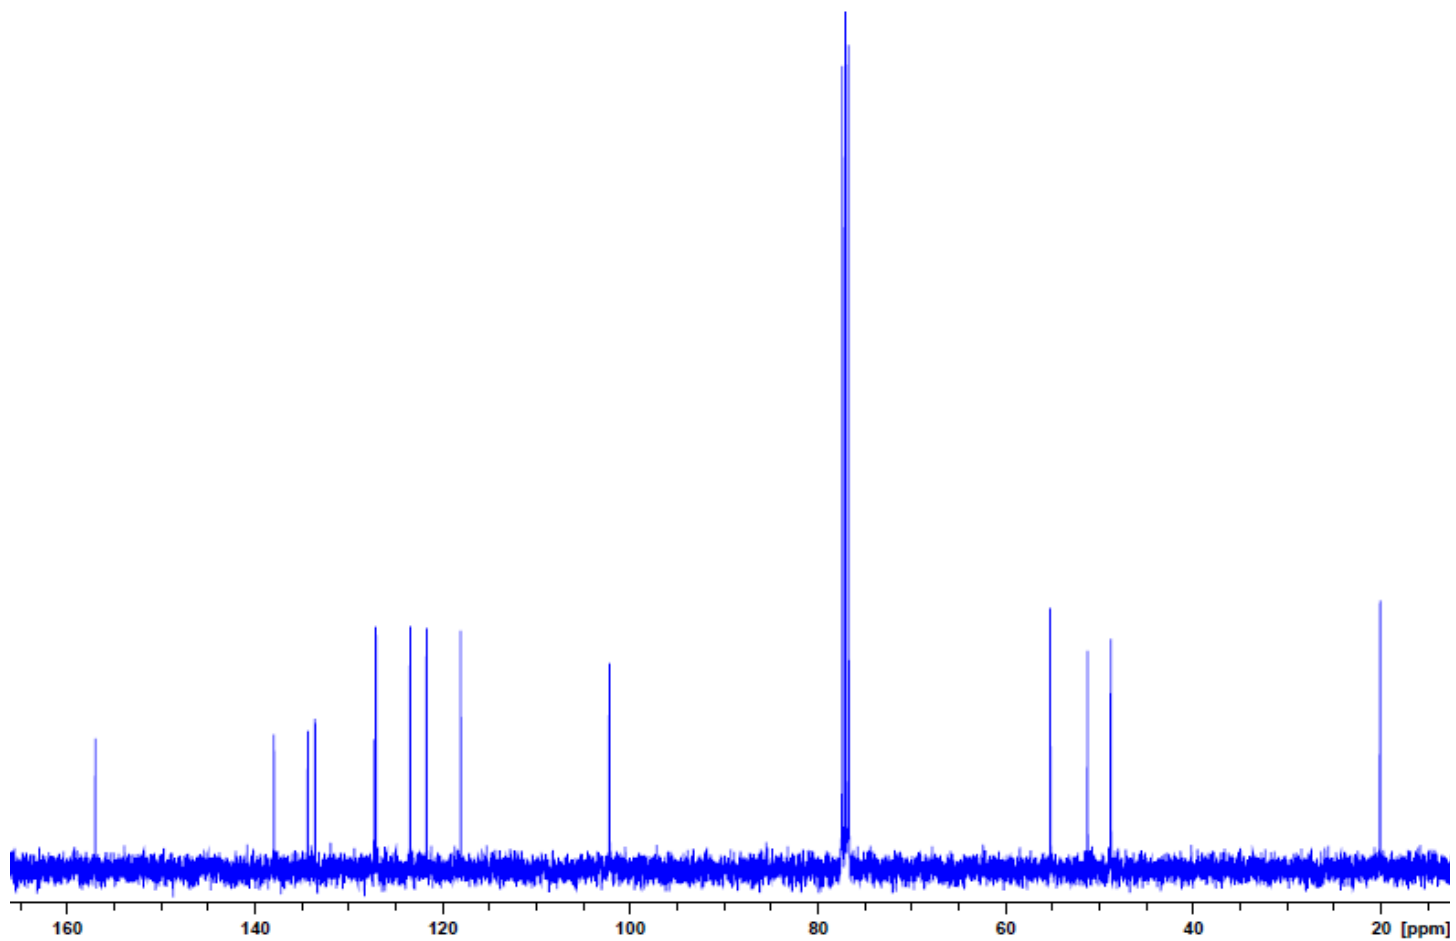

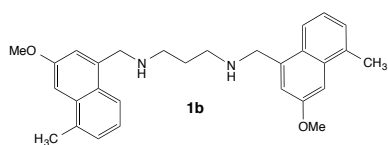

$^1\text{H}$  NMR (400 MHz,  $\text{CDCl}_3$ )

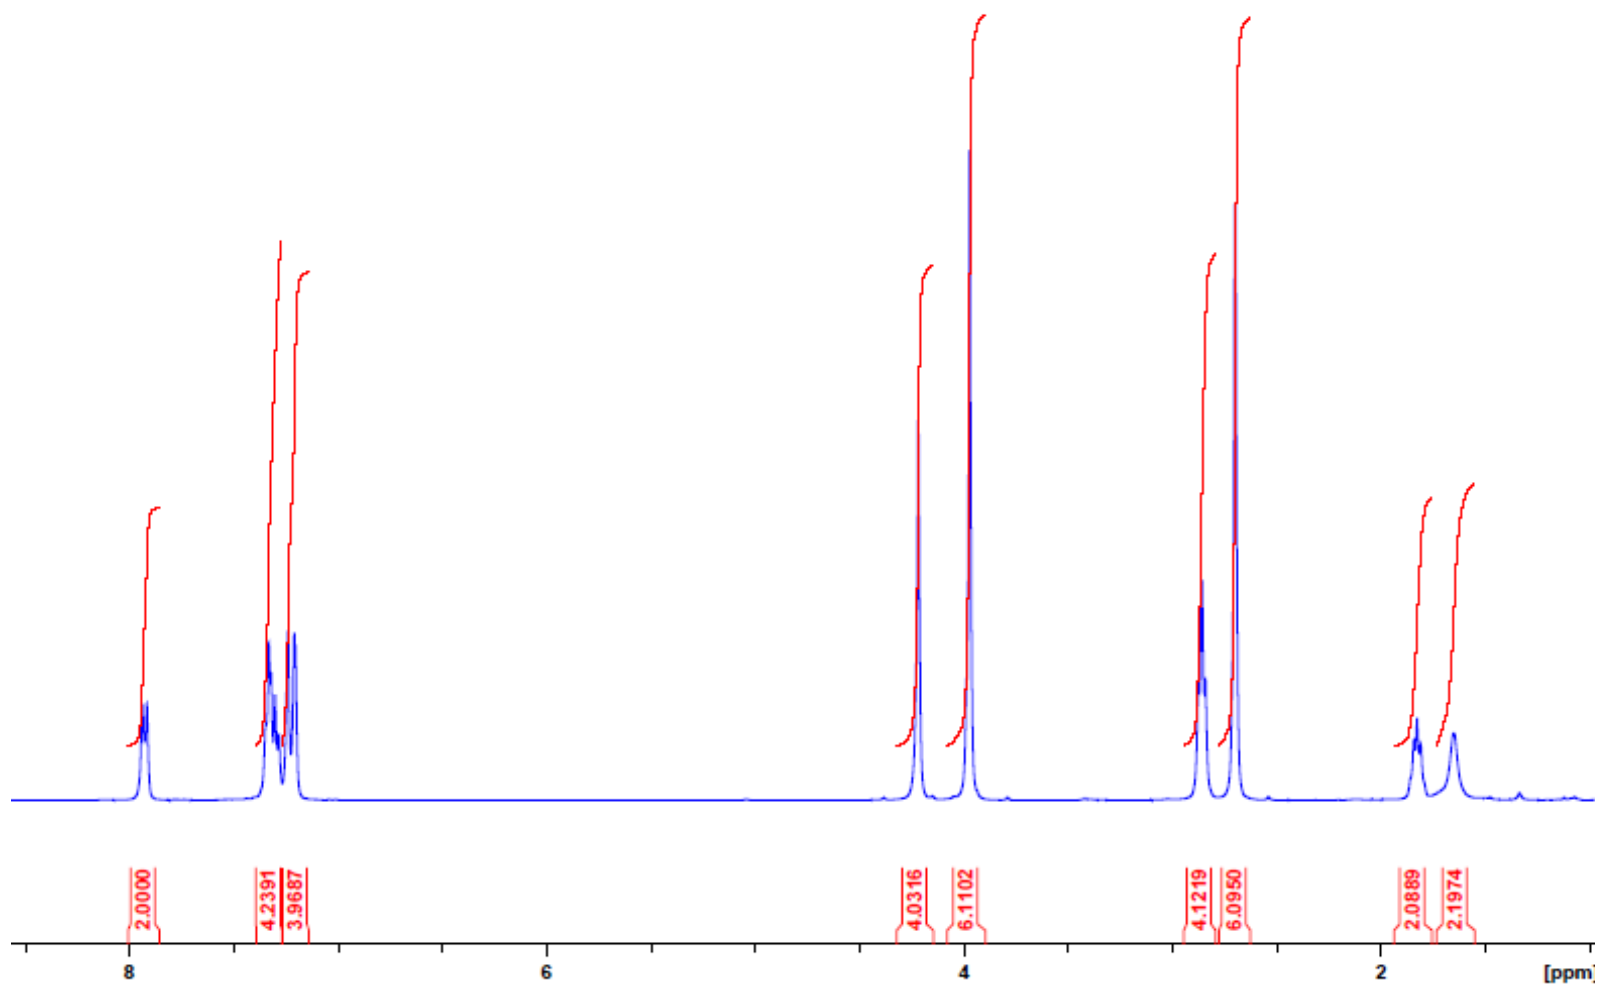

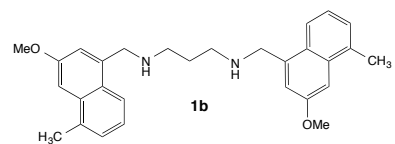

$^{13}\text{C}$  NMR (100 MHz,  $\text{CDCl}_3$ )

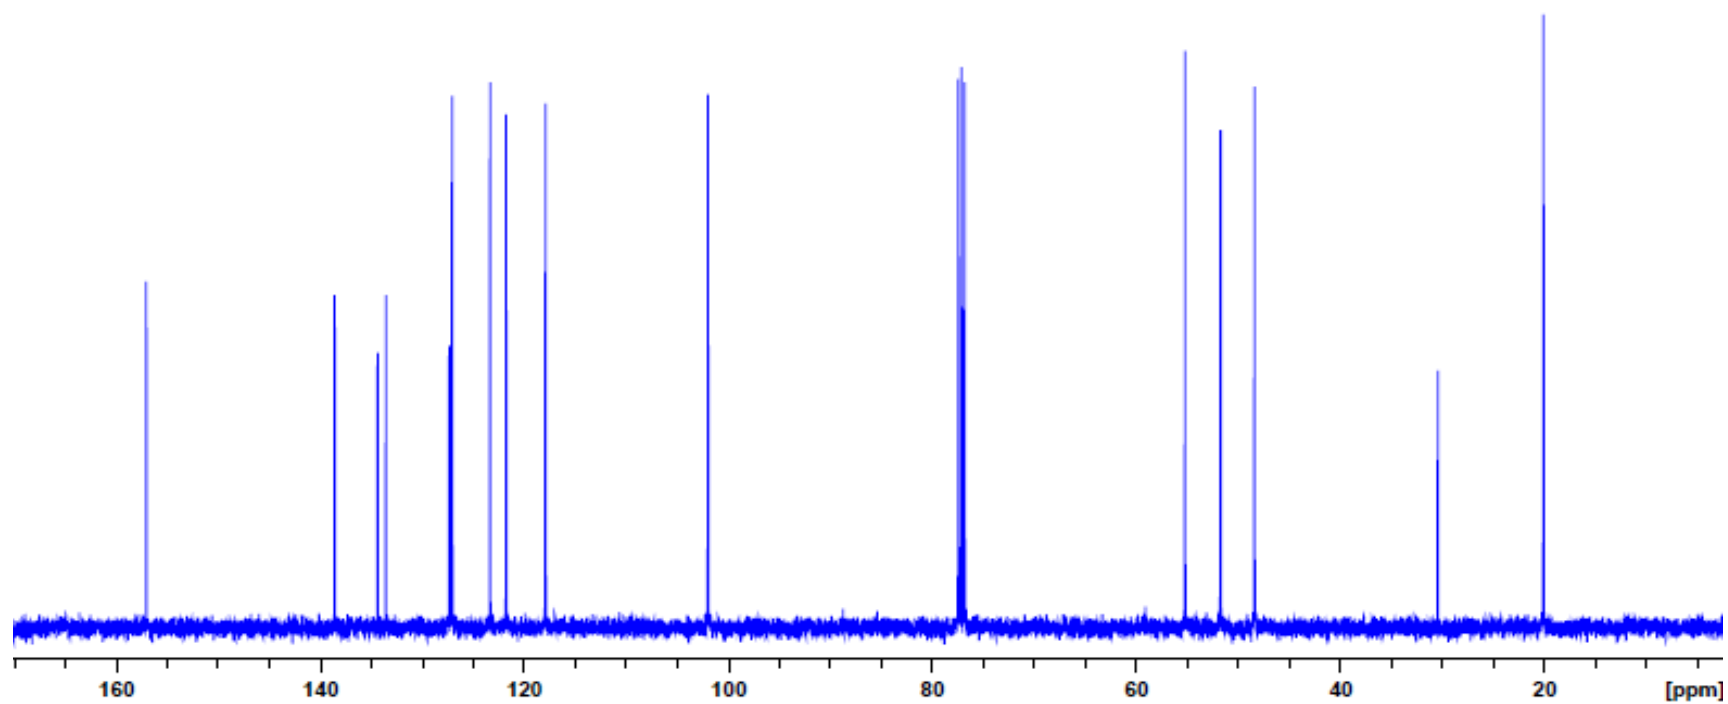



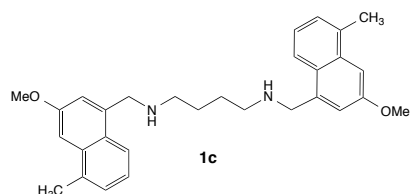

$^1\text{H}$  NMR (400 MHz,  $\text{CDCl}_3$ )

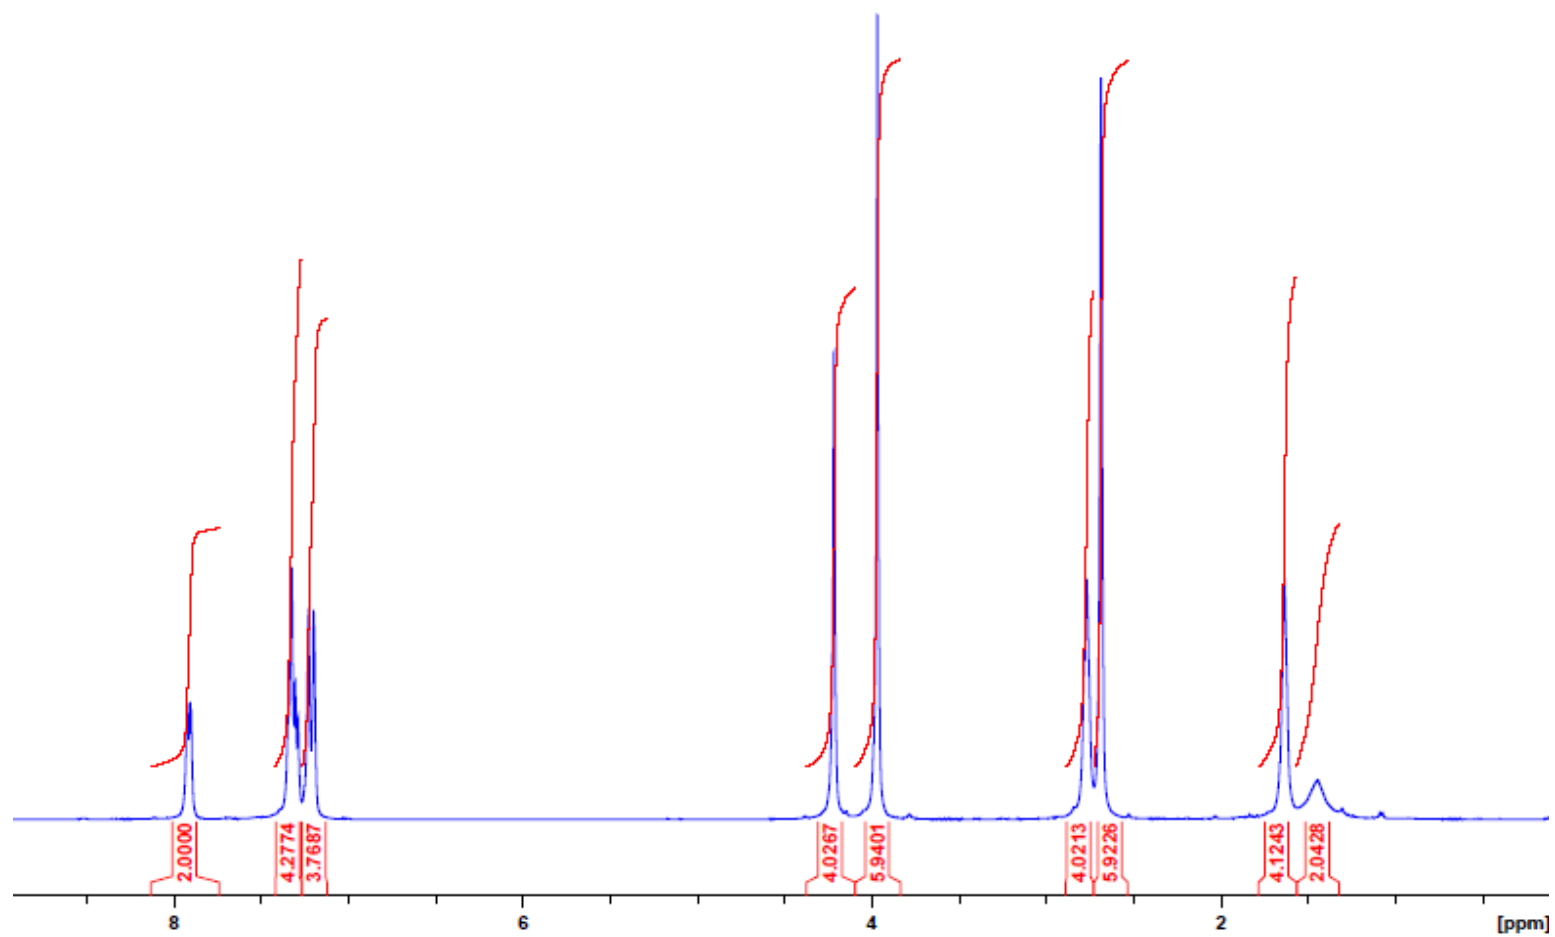

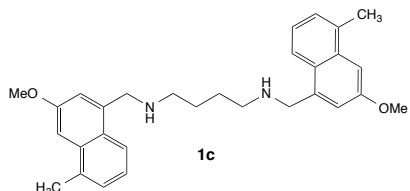

$^{13}\text{C}$  NMR (100 MHz,  $\text{CDCl}_3$ )

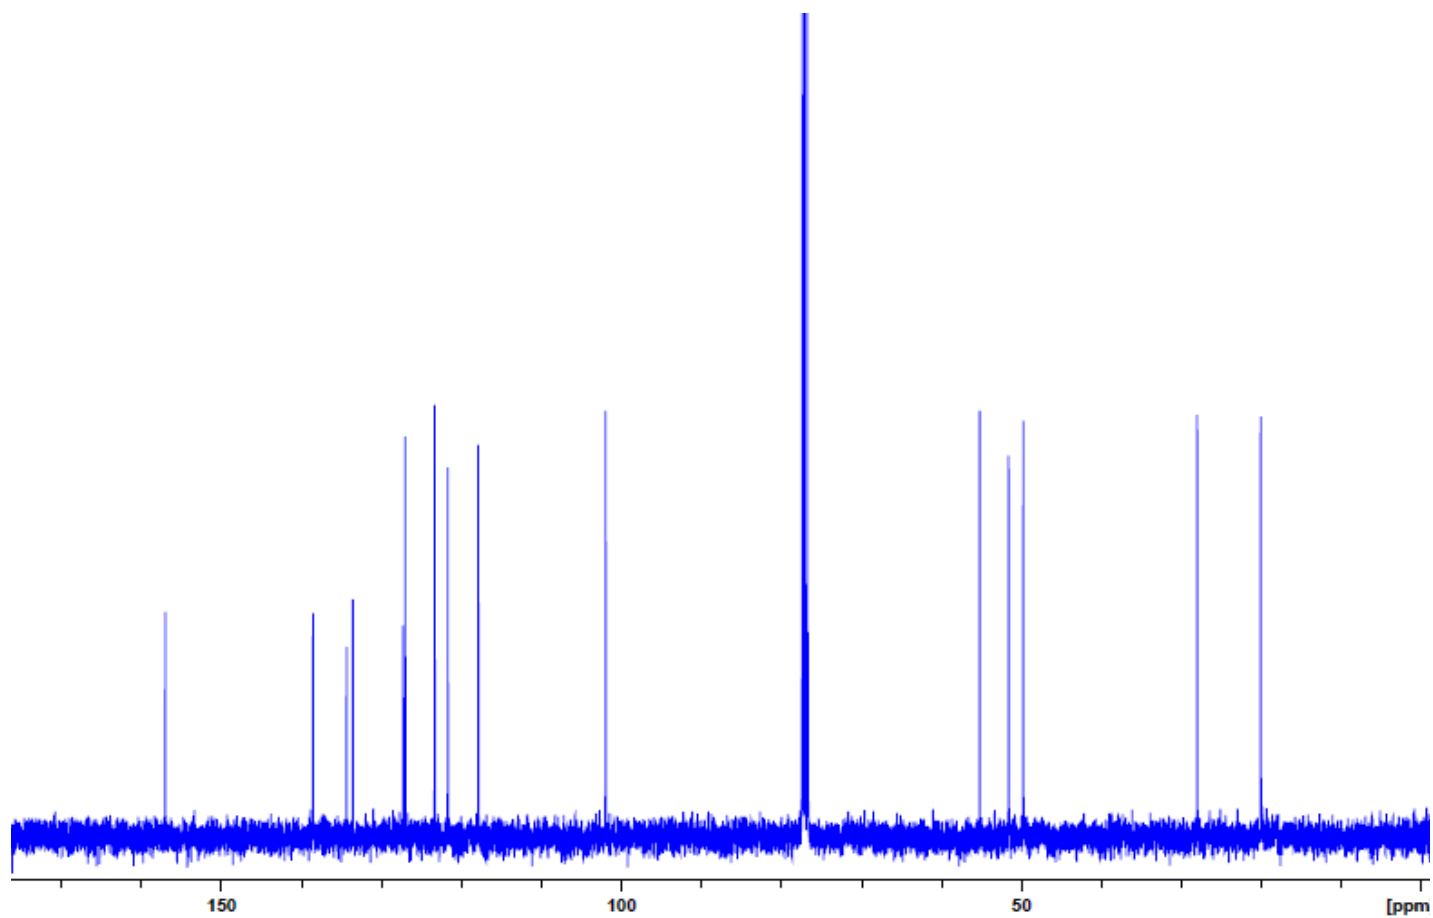

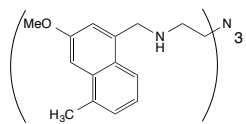

1d

<sup>1</sup>H NMR (400 MHz, CDCl<sub>3</sub>)

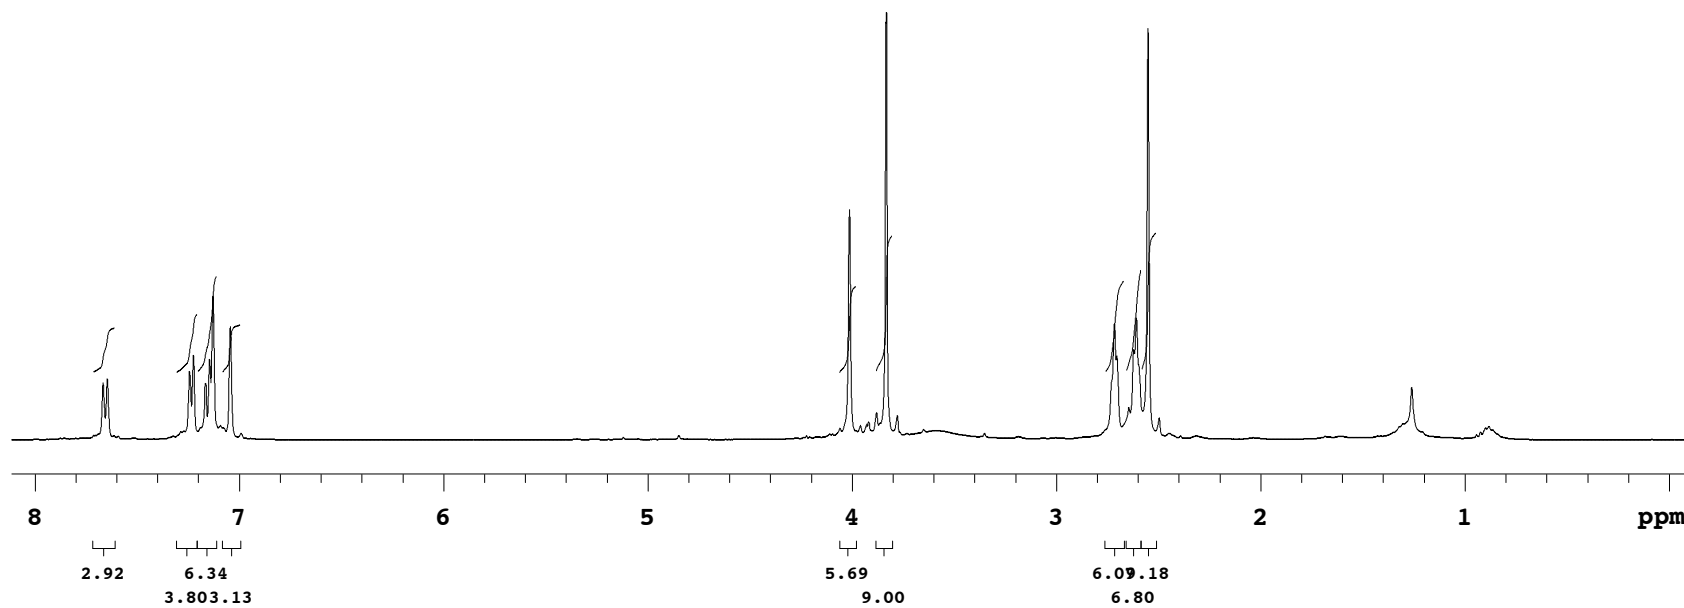

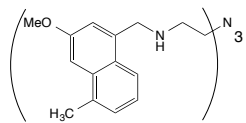

1d

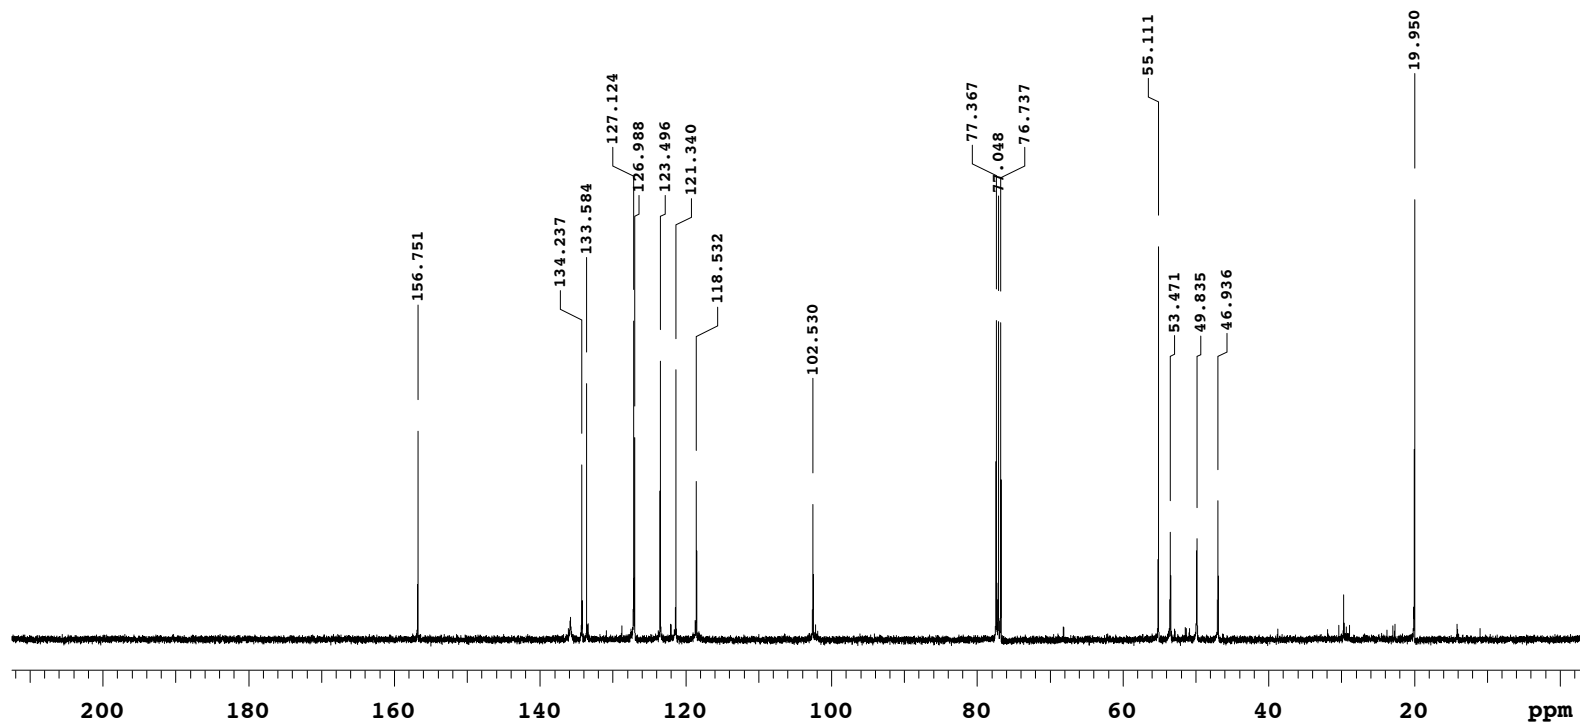

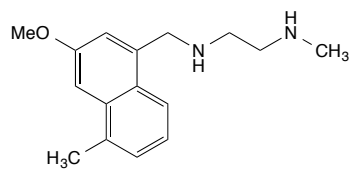

2a

<sup>1</sup>H NMR (400 MHz, CDCl<sub>3</sub>)

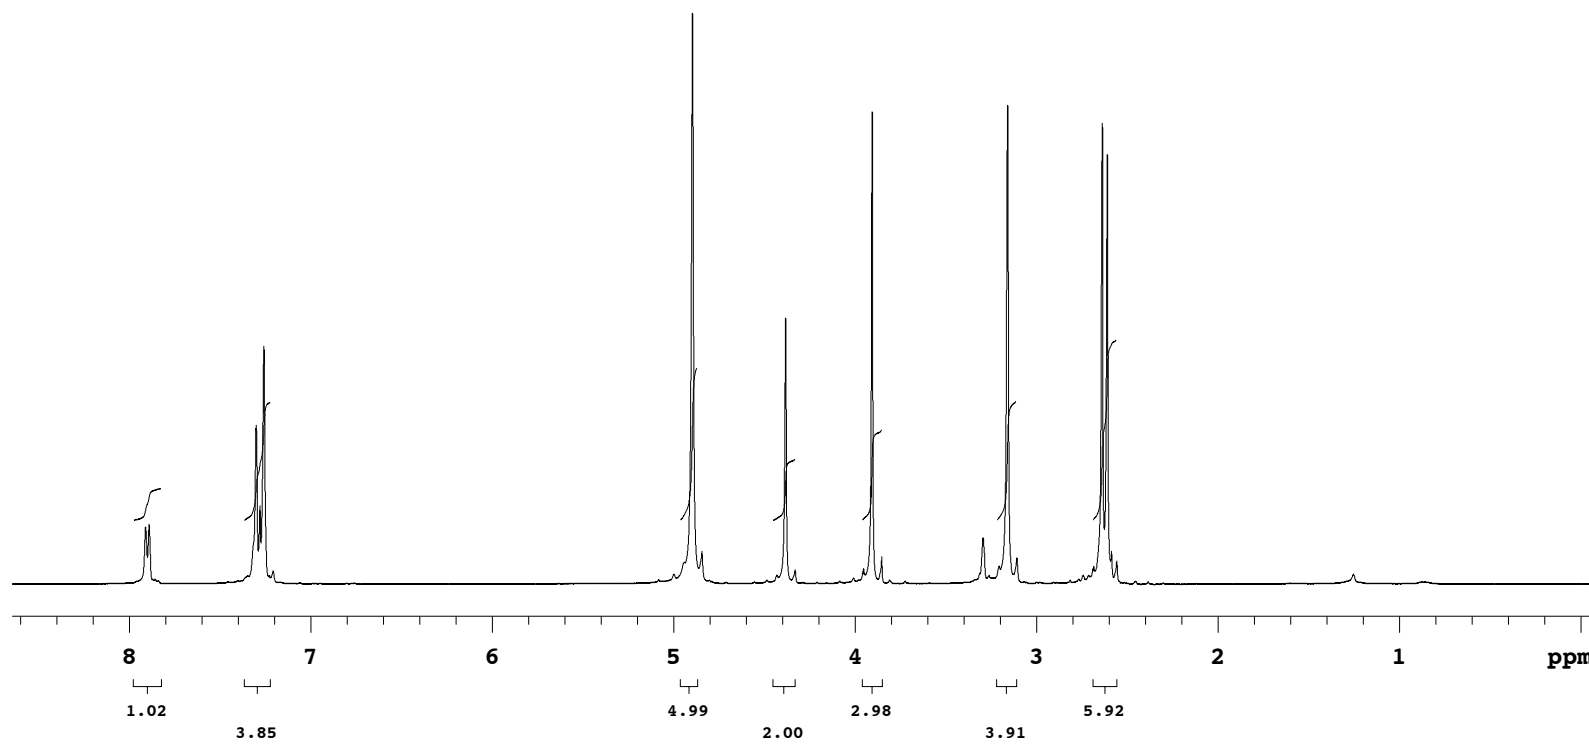

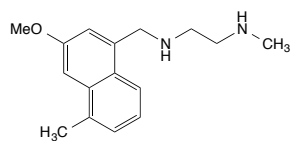

**2a**

<sup>13</sup>C NMR (100 MHz, CDCl<sub>3</sub>)

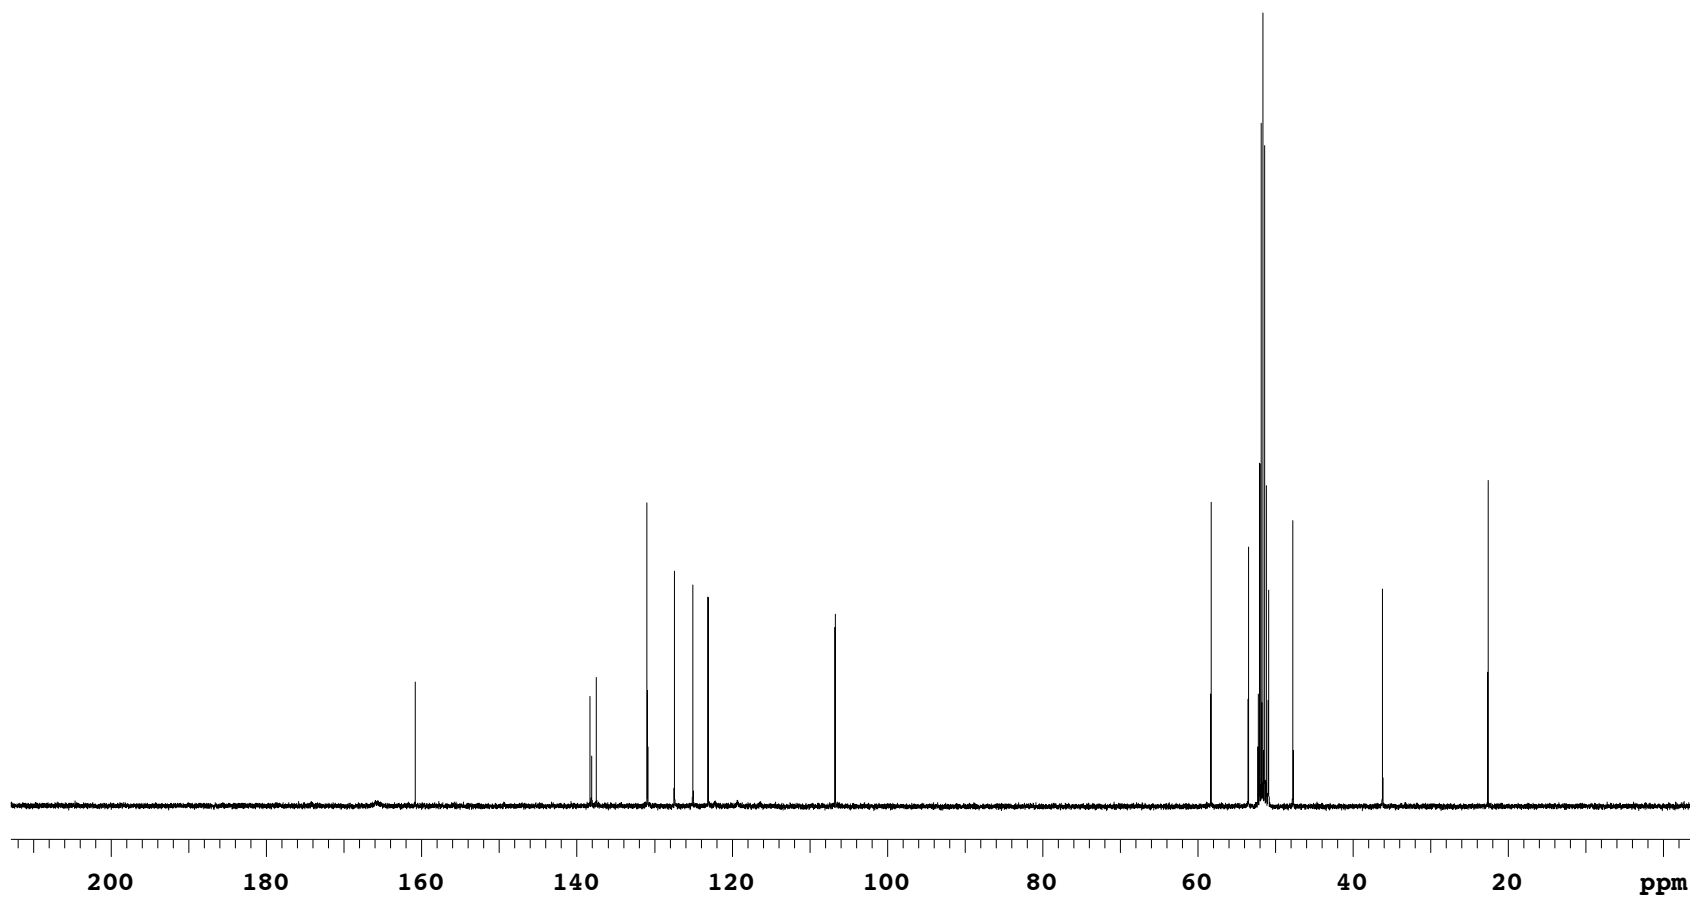

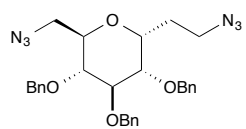

**8**

$^1\text{H}$  NMR (400 MHz,  $\text{CDCl}_3$ )

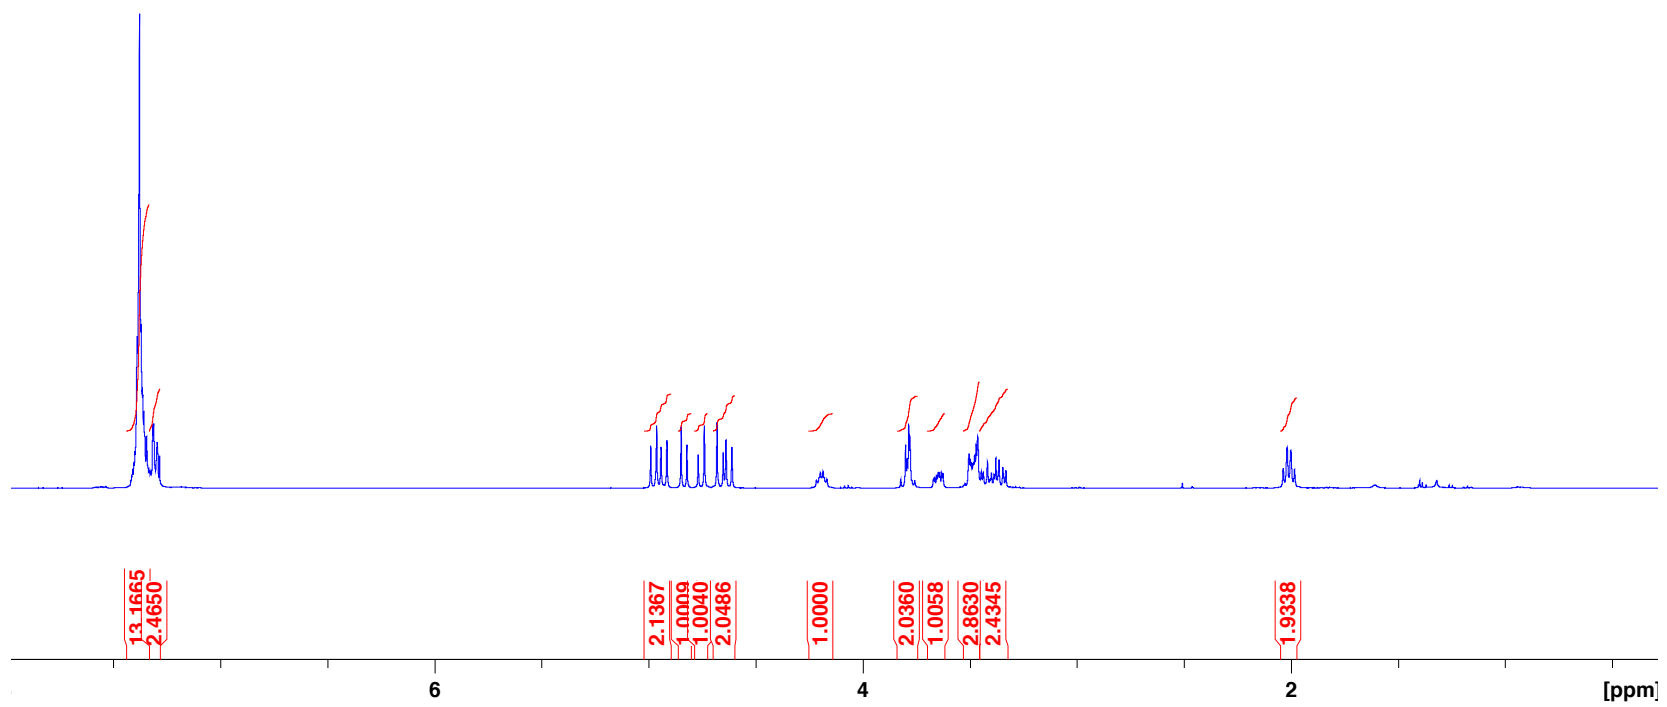

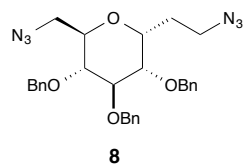

$^{13}\text{C}$  NMR (100 MHz,  $\text{CDCl}_3$ )

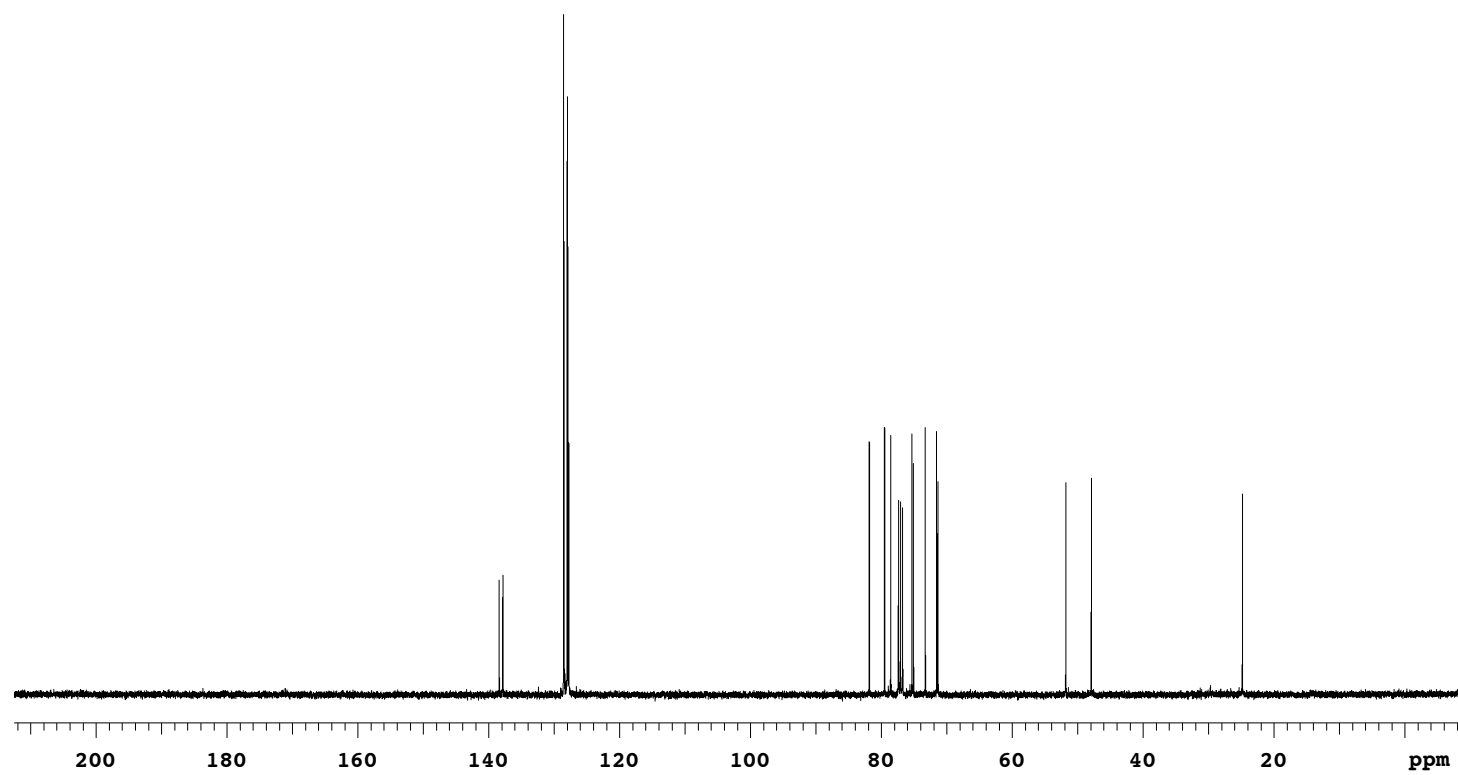



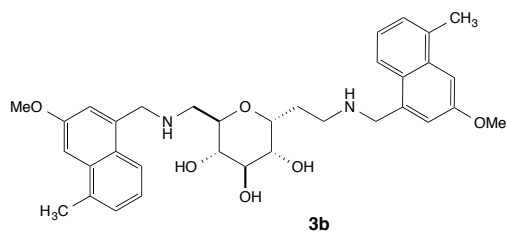

$^1\text{H NMR}$  (400 MHz,  $\text{CDCl}_3$ )

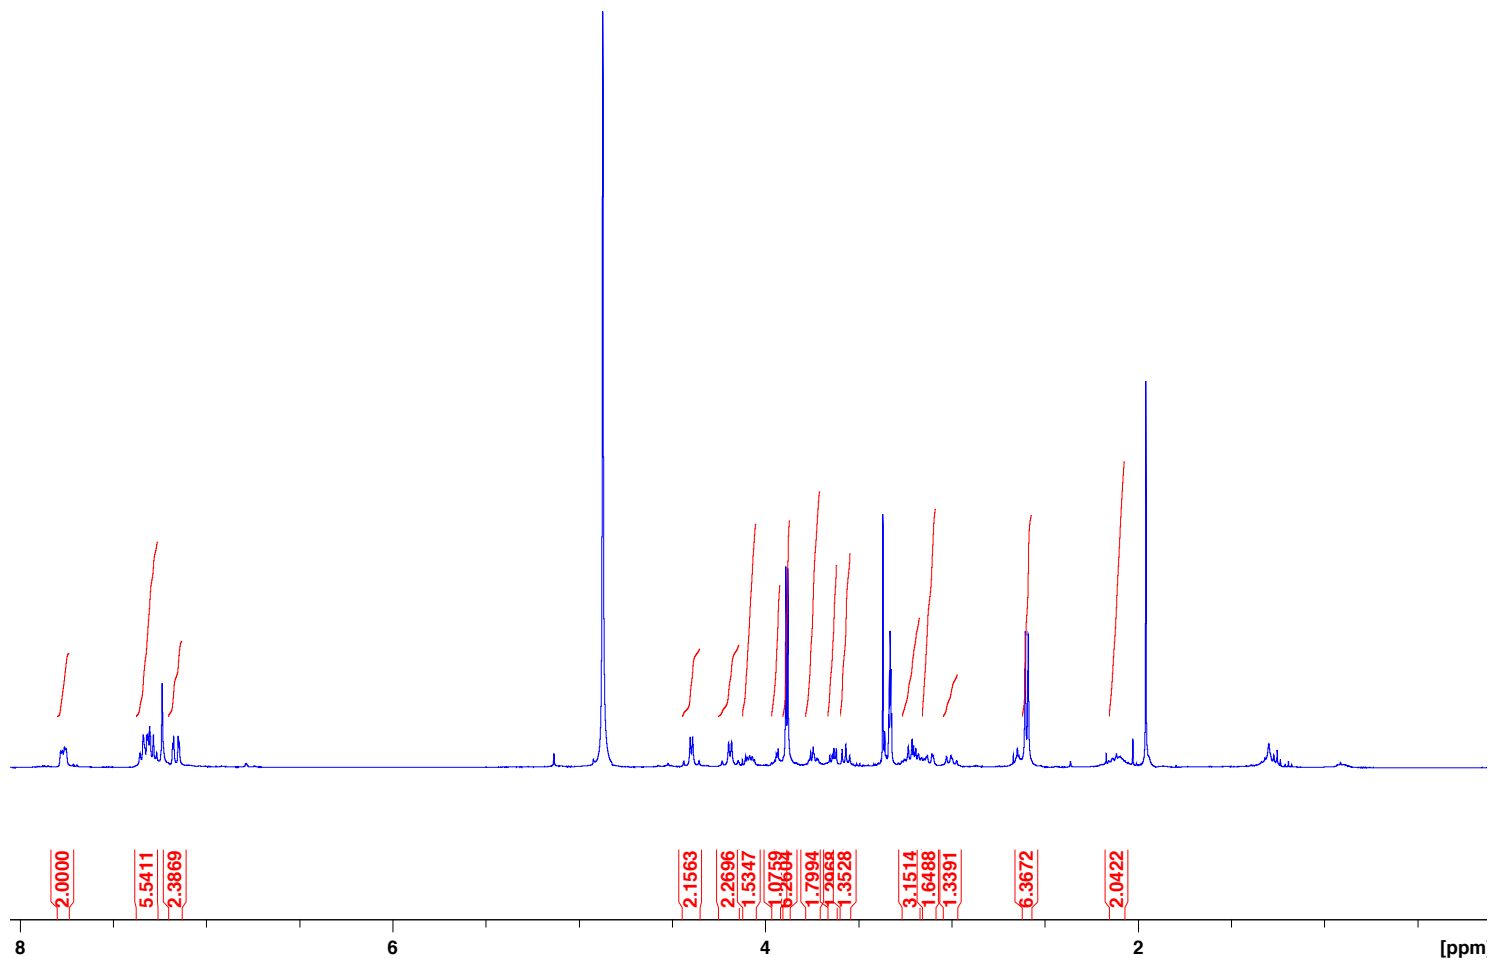

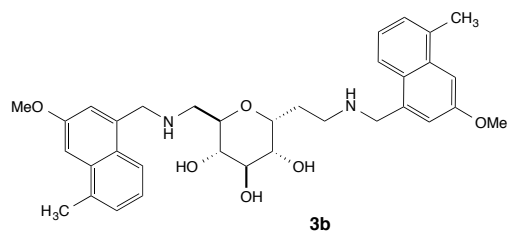

$^{13}\text{C}$  NMR (100 MHz,  $\text{CDCl}_3$ )

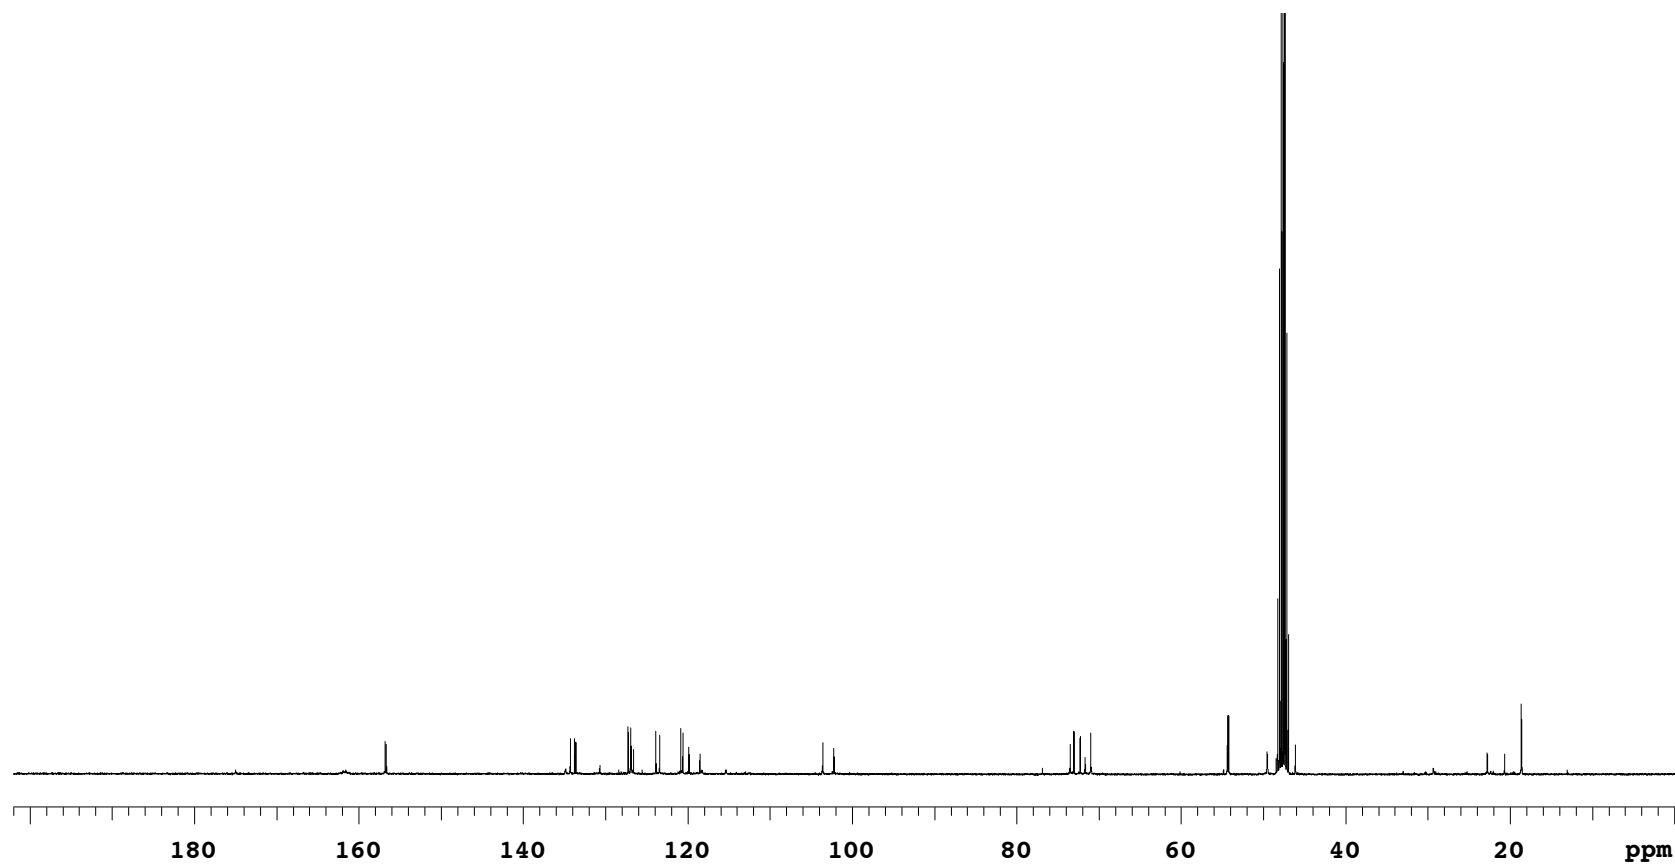

## DNA Binding Studies

**Materials:** CT-DNA was purchased from CALBIOCHEM. Solutions of CT-DNA were prepared in 10mM Tris-EDTA buffer at pH 5.48 (as described in Jenkins: Jenkins, T.C. Optical Absorbance and Fluorescence Techniques for Measuring DNA-Drug Interactions. In *Methods in Molecular Biology, Drug-DNA Interaction Protocols*; Fox, K.R., Ed. Humana: Totowa, 1997; Vol 90, pp.195-217) and gave a 1.83:1 absorbance ratio at 260 nm and 280 nm. DNA and ligand concentrations were determined using 8452A HP Diode Array Spectrophotometer: CT-DNA,  $\epsilon_{260} = 6600 \text{ M}^{-1} \text{ cm}^{-1} \text{ bp}^{-1}$  (1.82:1 absorbance ratio at 260 nm and 280 nm); poly(dG)•polyd(C),  $\epsilon_{253} = 7400 \text{ M}^{-1} \text{ cm}^{-1} \text{ bp}^{-1}$ ; poly (dA) • poly (dT),  $\epsilon_{260} = 6000 \text{ M}^{-1} \text{ cm}^{-1} \text{ bp}^{-1}$ ; poly(dA-dT)•poly(dA-dT),  $\epsilon_{262} = 6600 \text{ M}^{-1} \text{ cm}^{-1} \text{ bp}^{-1}$ ; Lambda phage DNA: 5 units dissolved in 500 mL buffer provides a solution of 0.76 mM/bp. Methyl Green,  $\epsilon_{631} = 85,300 \text{ M}^{-1} \text{ cm}^{-1}$ ; netropsin,  $\epsilon_{296} = 21,500 \text{ M}^{-1} \text{ cm}^{-1}$ ; Hoechst 33342,  $\epsilon_{340} = 47,000 \text{ M}^{-1} \text{ cm}^{-1}$ ; Ethidium Bromide,  $\epsilon_{480} = 5450 \text{ M}^{-1} \text{ cm}^{-1}$ ; 1a-1c, 3b,  $\epsilon_{336} = 6089 \text{ M}^{-1} \text{ cm}^{-1}$ ; 1d,  $\epsilon_{336} = 9134 \text{ M}^{-1} \text{ cm}^{-1}$ ; 2a,  $\epsilon_{336} = 3045 \text{ M}^{-1} \text{ cm}^{-1}$ .

## EB competitive experiments

Constant concentrations of CT-DNA (poly(dG)•polyd(C), poly (dA)•poly (dT), poly(dA-dT)•poly(dA-dT), or Lambda phage DNA, 10  $\mu\text{M}$ ) and EtBr (10  $\mu\text{M}$ ) were titrated with increasing concentrations of the ligands (from 1 mM and 100  $\mu\text{M}$  stock solutions), in the presence or absence of fixed concentrations of NaCl or the competitors methyl green or netropsin. The maximum emission wavelength was 490 nm when the excitation wavelength was 520 nm. Fluorescence titrations were recorded from 520 nm to 692 nm after an equilibration period of 3 min. Ex Slit (nm) = 10.0; Em Slit (nm) = 10.0; Scan Speed (nm/min) = 200.

## Viscosity Studies

Viscosity experiments were performed with an Ostwald viscometer in a constant water bath at  $23.0 \pm 1^\circ\text{C}$ . Solutions of constant DNA concentrations and varying ligand concentrations in Tris-EDTA buffer were incubated for 30 minutes. A digital stopwatch was used to record the flow time. The relative viscosity was calculated as from the following equation:

$$\eta = \frac{t-t_0}{t_0}$$

where  $t_0$  and  $t$  are the flow time in the absence and presence of the ligand.  $\eta$  is the viscosity in the presence of the ligand and  $\eta_0$  is the viscosity in the absence of the ligand. The data were graphed as  $(\eta/\eta_0)^{1/3}$  vs. [ligand]/[DNA].

## Circular Dichroism Studies.

Small aliquots (0.6-5.0  $\mu\text{L}$ ) of a concentrated **1d** solution (1 mM) were added to a solution (2 mL, 100 mM KCl, 10 mM SC, 0.5 mM EDTA, pH 6.8) of CT-DNA (80  $\mu\text{M}$ /bp), inverted twice, and incubated for 5 min at  $20^\circ\text{C}$ . The CD spectra were then recorded as an average of three scans from 220 to 310 nm and data recorded in 0.1 nm increments with an averaging time of 2 s.

Compound 1a Ethidium displacement studies;  $K_{app}=2.1 \times 10^6 M^{-1} \times 10/C50$

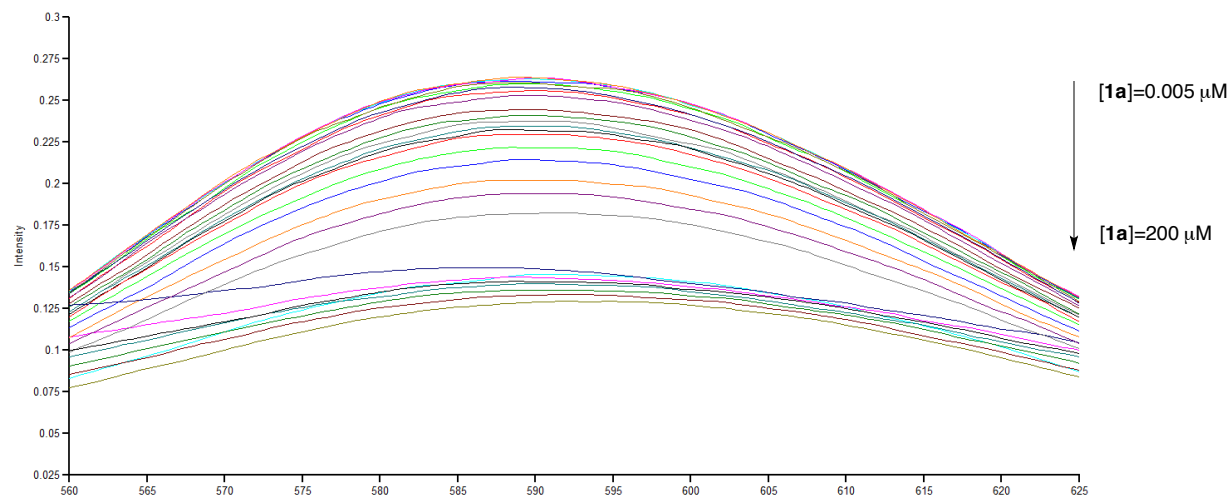

Titration of CT DNA (10  $\mu$ M) and ethidium (10  $\mu$ M) with **1a**: 0.005, 0.01, 0.02, 0.04, 0.05, 0.1, 0.2, 0.33, 0.45, 0.56, 0.63, 0.71, 0.83, 1.00, 1.25, 1.67, 2.50, 3.30, 5.0, 10.0, 20.0, 30.0, 40.0, 50.0, 60.0, 100.0, 200.0  $\mu$ M

Trial 1:  $K_{app}= 6.17 \times 10^6 M^{-1}$ ; Trial 2:  $K_{app}= 8.40 \times 10^6 M^{-1}$ ; Trial 3:  $K_{app}= 7.00 \times 10^6 M^{-1}$

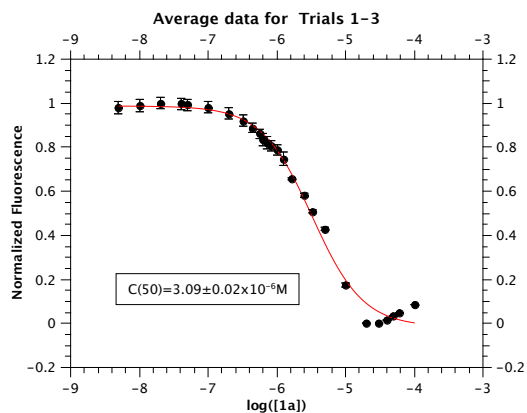

Average  $K_{app}=7.19 \pm 0.92 \times 10^6 M^{-1}$

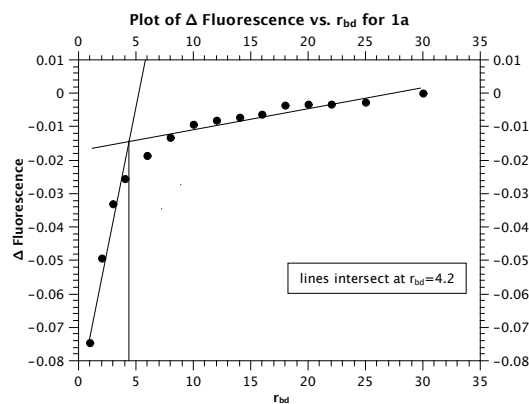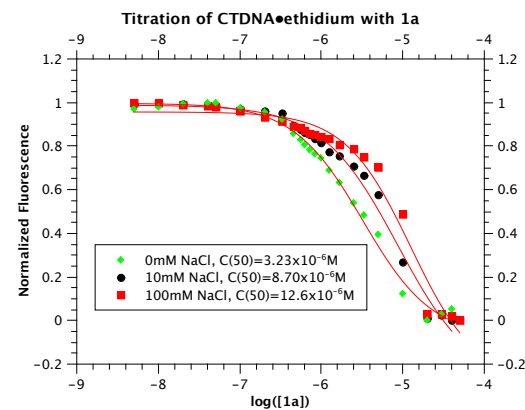

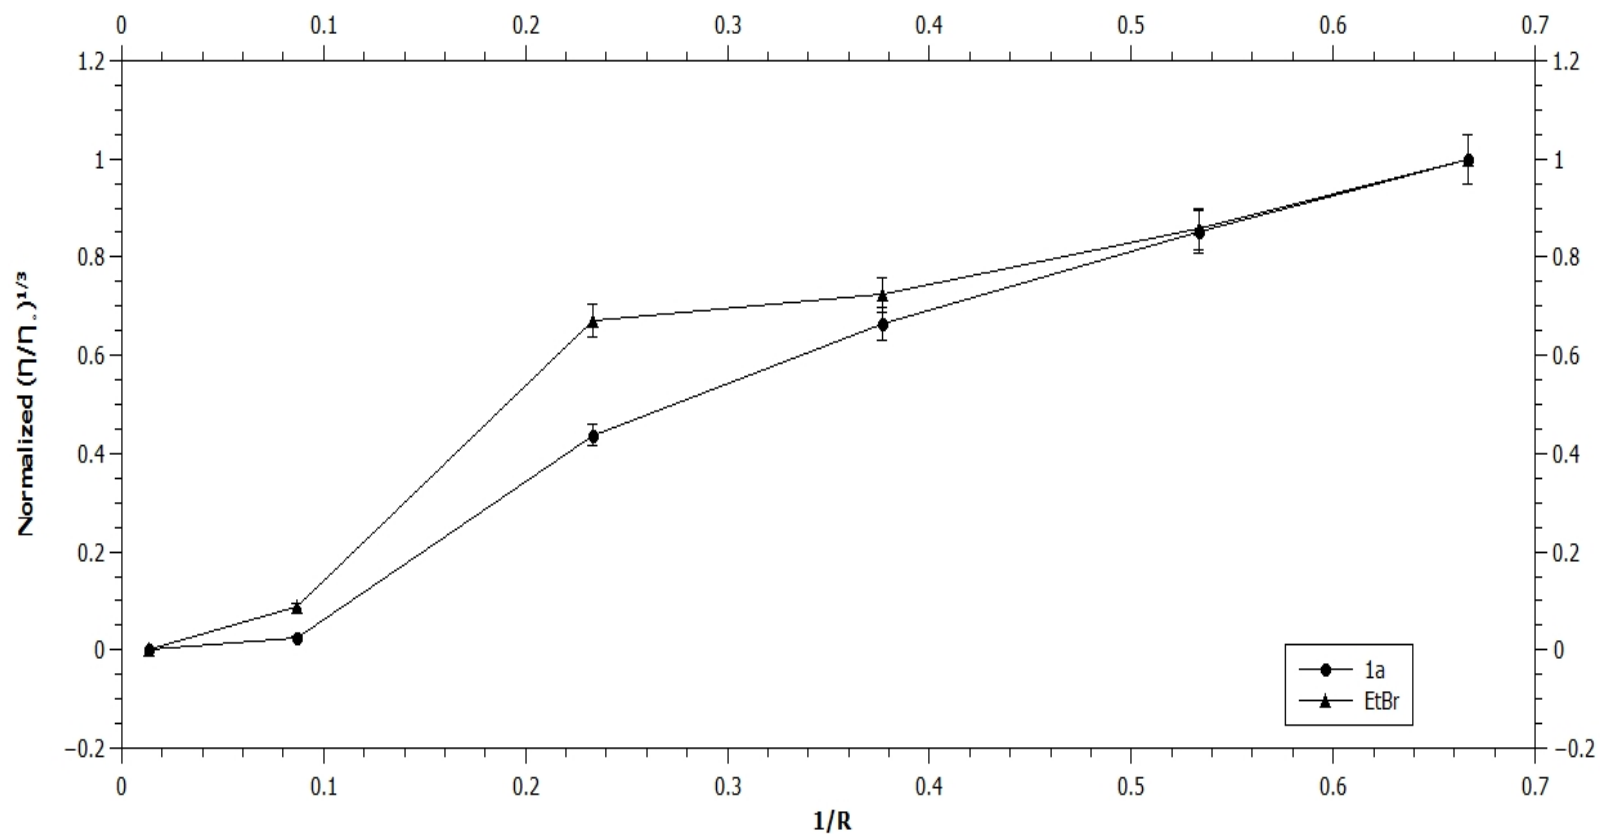

Effect of increasing amount of EtBr ( $\blacktriangle$ ) and **1a** ( $\bullet$ ) on relative viscosity of CT-DNA. EB ( $\blacktriangle$ ): [CT-DNA] = 300  $\mu$ M, [EB] = 4, 26, 70, 113, 160, and 200  $\mu$ M; **1a** ( $\bullet$ ): [CT-DNA] = 300  $\mu$ M, [**1a**] = 8, 52, 140, 226, 320, and 400  $\mu$ M.

**Compound 1b Ethidium displacement studies;  $K_{app}=2.1 \times 10^6 M^{-1} \times 10/C50$**

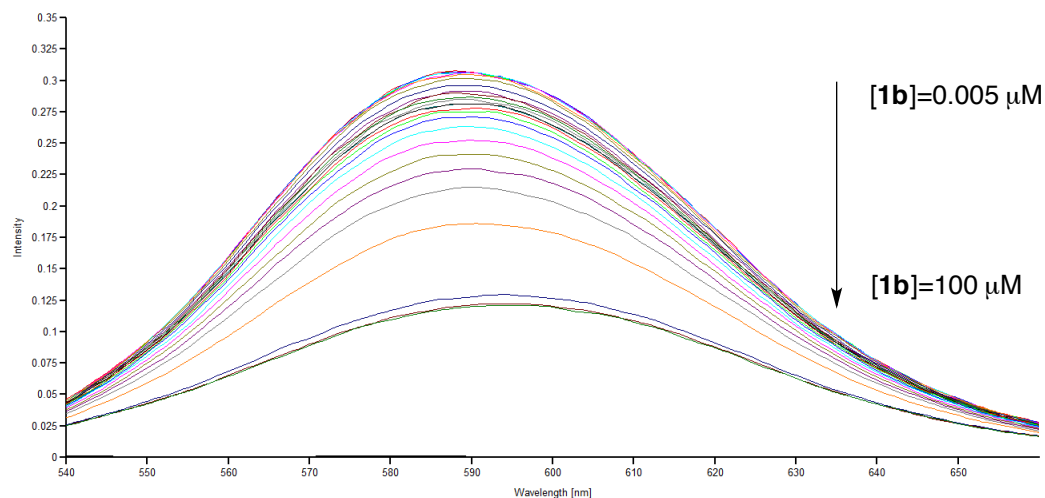

Titration of CT DNA (10  $\mu M$ ) and ethidium (10  $\mu M$ ) with **1b**: 0.005, 0.01, 0.02, 0.04, 0.05, 0.1, 0.2, 0.33, 0.45, 0.56, 0.63, 0.71, 0.83, 1.00, 1.25, 1.67, 2.50, 3.30, 5.0, 10.0, 20.0, 30.0, 40.0, 60.0, 80.0, 100.0  $\mu M$

Trial 1:  $K_{app}=2.35 \times 10^6 M^{-1}$ ; Trial 2:  $K_{app}=3.31 \times 10^6 M^{-1}$ ; Trial 3:  $K_{app}=3.80 \times 10^6 M^{-1}$

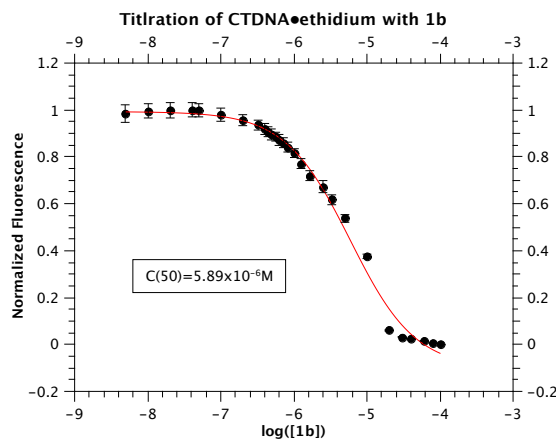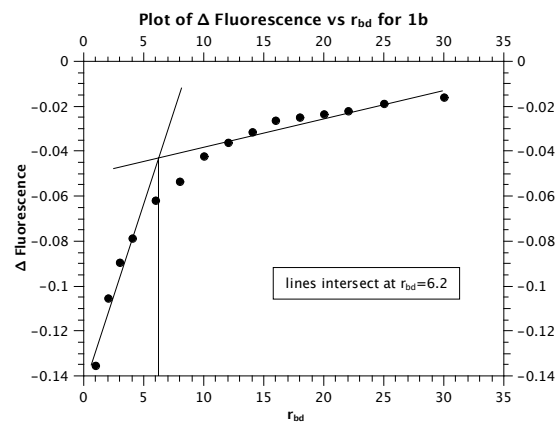

3 trials: Average  $K_{app}=3.15(\pm 0.60) \times 10^6 M^{-1}$

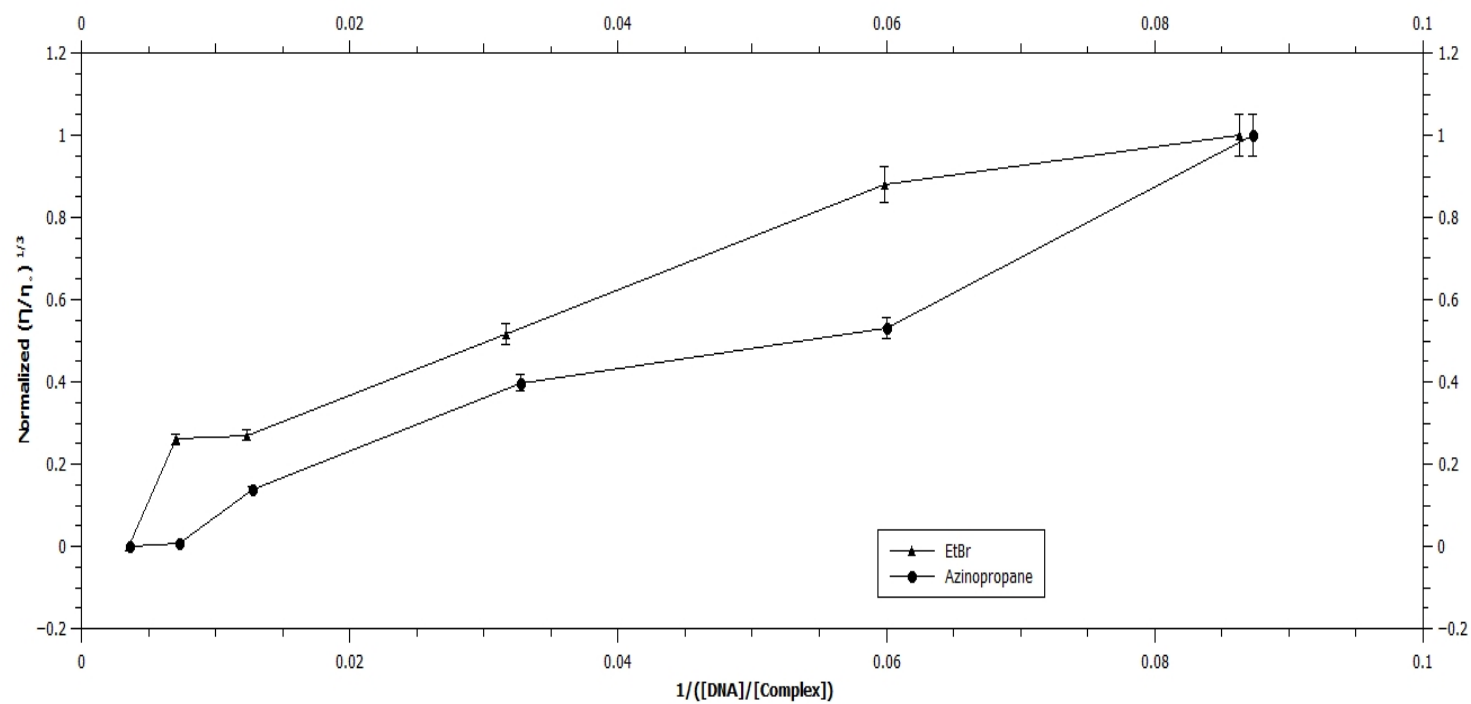

Effect of increasing amount of EtBr ( $\blacktriangle$ ) and **1b** ( $\bullet$ ) on relative viscosity of CT-DNA. EtBr ( $\blacktriangle$ ): [CT-DNA] = 301  $\mu$ M, [EtBr]= 1.06, 2.12, 3.71, 9.54, 18.02, and 25.97  $\mu$ M; **1b** ( $\bullet$ ): [CT-DNA] = 298  $\mu$ M, [**1b**]: 1.08, 2.17, 3.79, 9.76, 17.88, and 26.02  $\mu$ M

**Compound 1c Ethidium displacement studies;  $K_{app}=2.1 \times 10^6 M^{-1} \times 10/C50$**

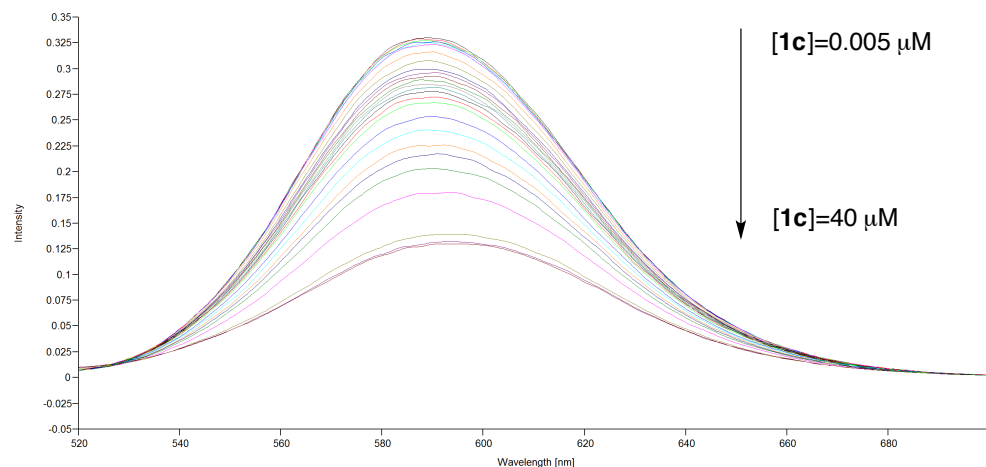

Titration of CT DNA (10  $\mu M$ ) and ethidium (10  $\mu M$ ) with **1c**: 0.005, 0.01, 0.02, 0.04, 0.05, 0.1, 0.2, 0.33, 0.45, 0.56, 0.63, 0.71, 0.83, 1.00, 1.25, 1.67, 2.50, 3.30, 5.0, 10.0, 20.0, 30.0, 40.0  $\mu M$

Trial 1:  $K_{app}=4.64 \times 10^6 M^{-1}$ ; Trial 2:  $K_{app}=4.71 \times 10^6 M^{-1}$ ; Trial 3:  $K_{app}=5.65 \times 10^6 M^{-1}$

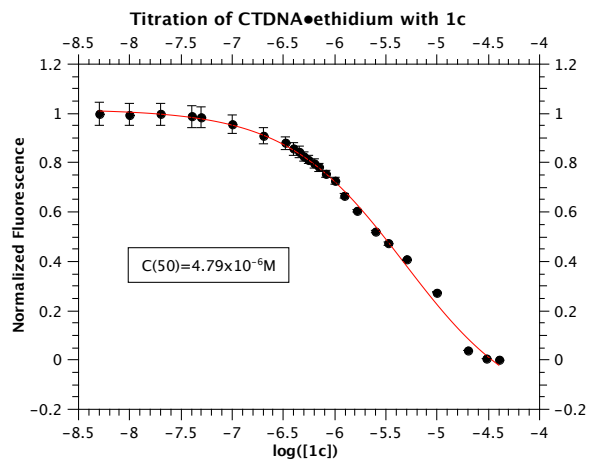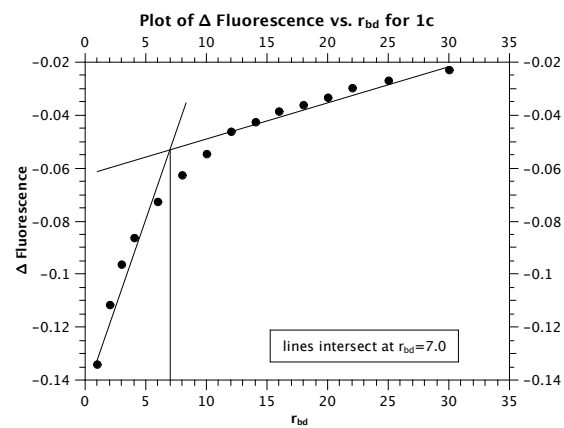

3 trials: **Average:**  $K_{app}=5.00 (\pm 0.46) \times 10^6 M^{-1}$



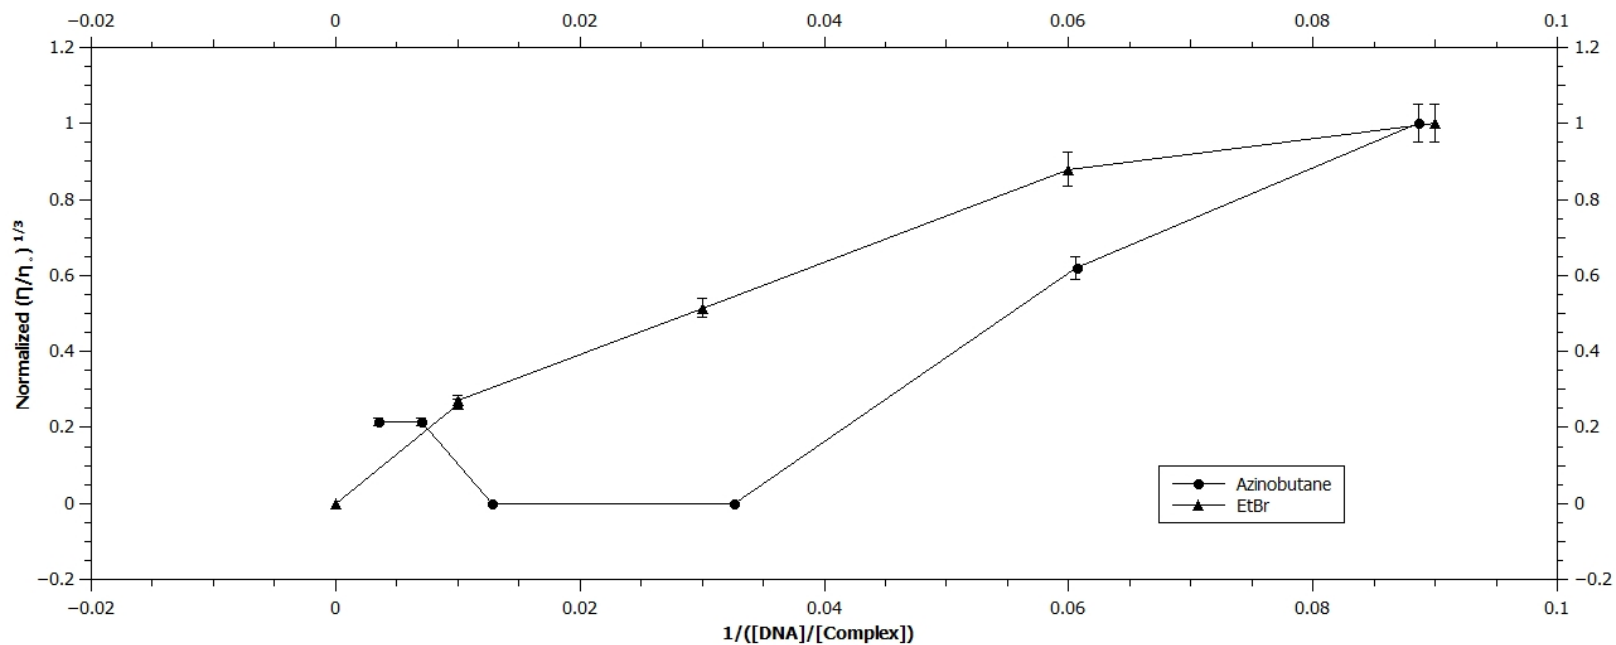

Effect of increasing amount of EtBr (▲) and **1c** (●) on relative viscosity of CT-DNA. EB (▲): [CT-DNA] = 300  $\mu$ M, [EB]= 4, 26, 70, 113, 160, and 200  $\mu$ M; **1c** (●): [CT-DNA] = 300  $\mu$ M, [**1c**]: 1, 2, 4, 10, 18, and 26  $\mu$ M.

**Compound 1d Ethidium displacement studies;  $K_{app}=2.1 \times 10^6 M^{-1} \times 10/C50$**

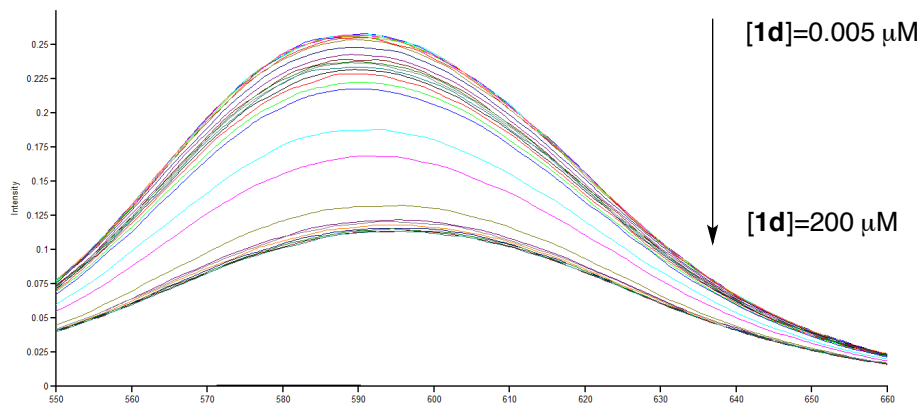

Titration of CT DNA (10  $\mu M$ ) and ethidium (10  $\mu M$ ) with **1d**: 0.005, 0.01, 0.02, 0.04, 0.05, 0.1, 0.2, 0.33, 0.45, 0.56, 0.63, 0.71, 0.83, 1.00, 1.25, 1.67, 2.50, 3.30, 5.0, 10.0, 20.0, 30.0, 40.0, 50.0, 60.0, 100.0, 200.0  $\mu M$

Trial 1  $K_{app}=26.45 \times 10^6 M^{-1}$ ; Trial 2  $K_{app}=24.11 \times 10^6 M^{-1}$ ; Trial 3  $K_{app}=22.00 \times 10^6 M^{-1}$

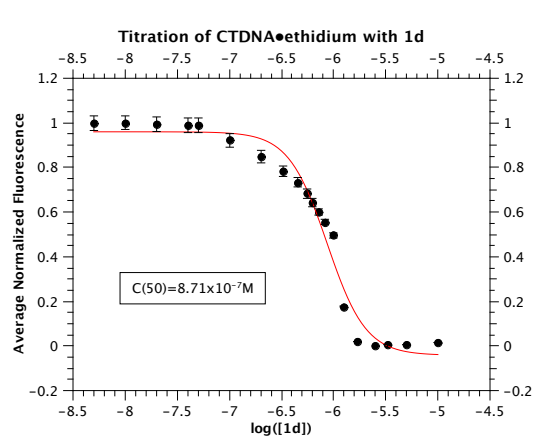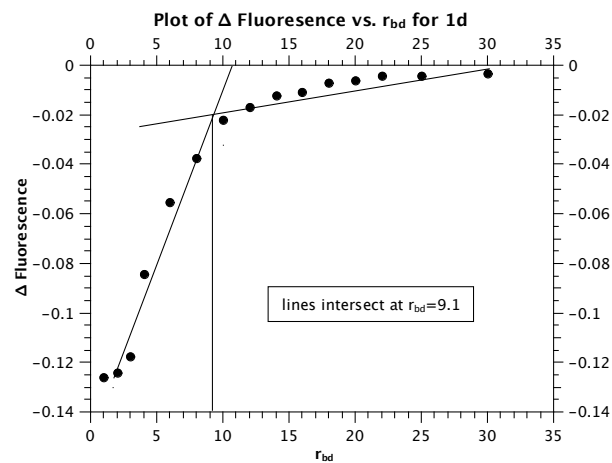

3 trials: Average  $K_{app}=24.18 (\pm 1.5) \times 10^6 M^{-1}$

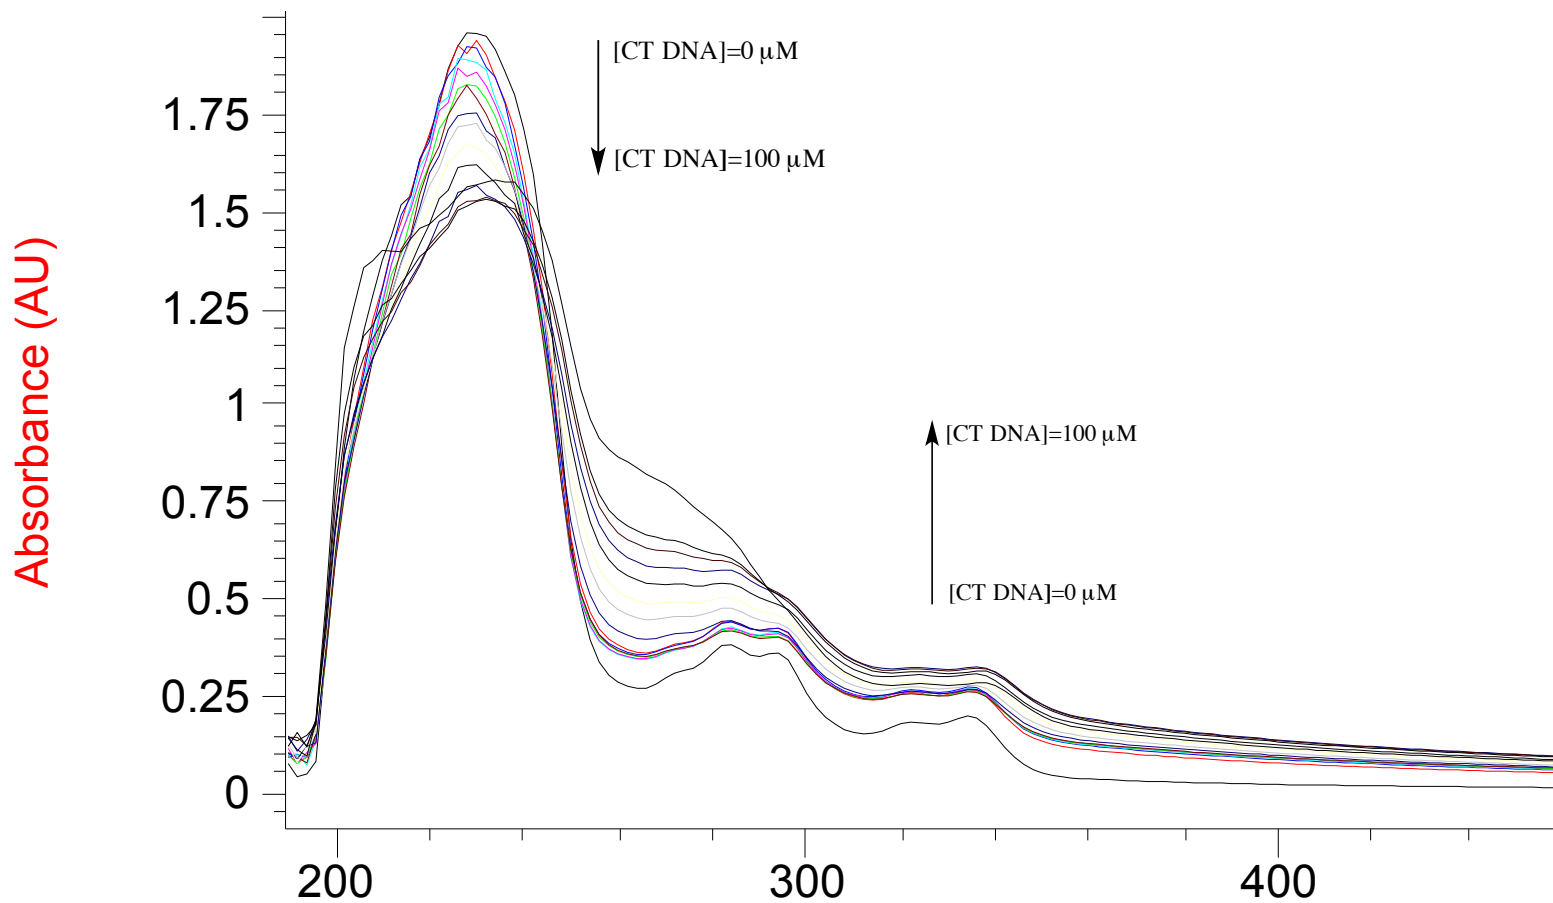

UV spectra of **1d** (25  $\mu\text{M}$  in 10mM Tris-EDTA, pH=5.48) in the presence of varying concentrations of CT-DNA: 0, 0.25, 0.5, 1.0, 2.0, 4.0, 5.0, 10.0, 15.0, 20.0, 25.0, 30.0, 40.0, 50.0, 100  $\mu\text{M}$ .

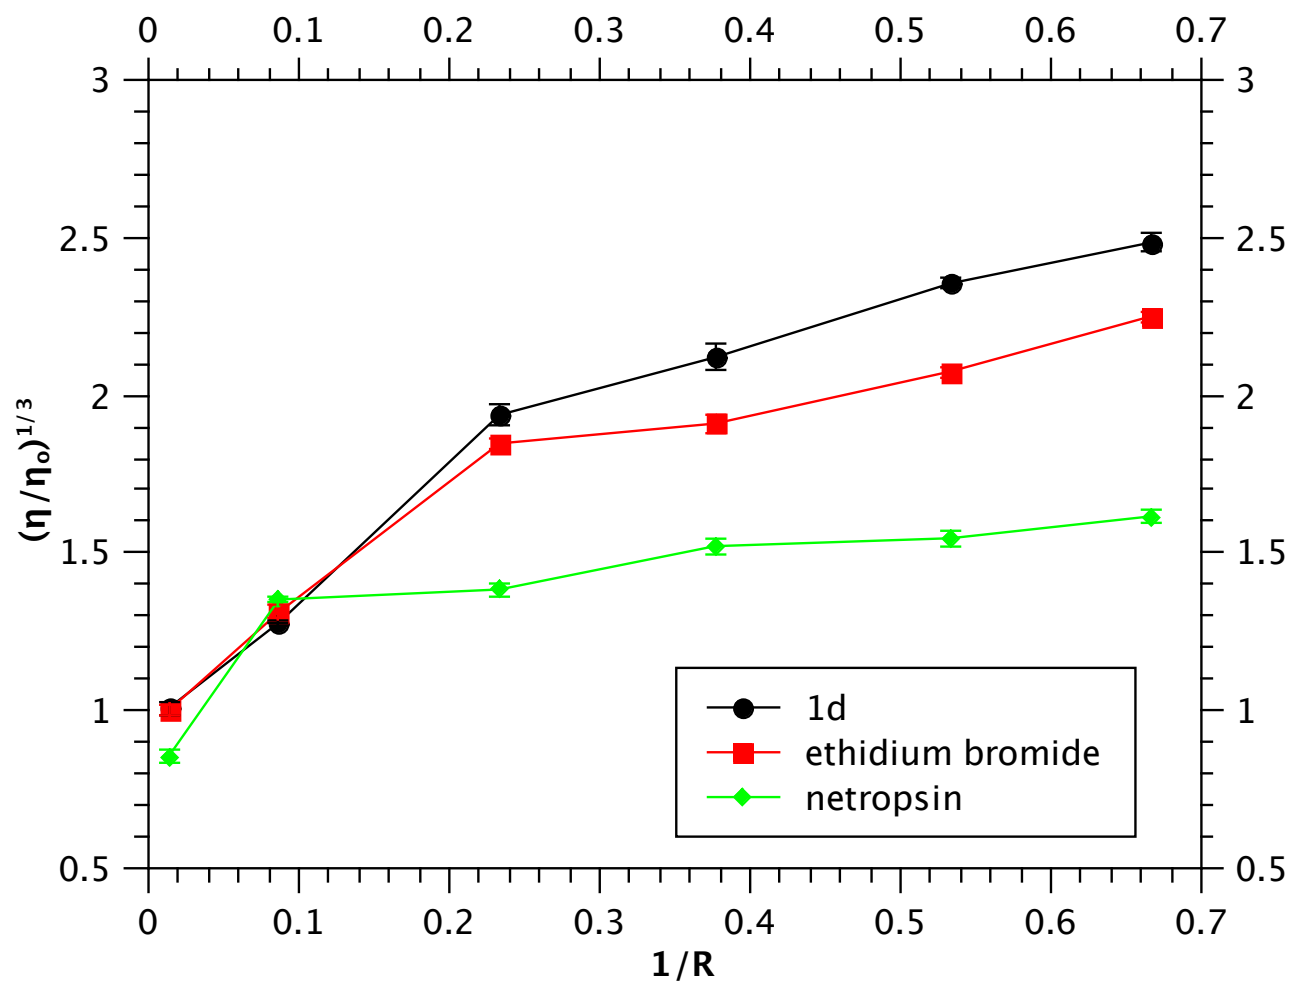

Effect of increasing amounts of **1d** (●), ethidium bromide (■), and netropsin (◆) on the relative viscosity of CT-DNA.  $R = [\text{DNA}(\text{bp})]/[\text{ligand}]$ ; **1d** (●): [CT-DNA] = 300  $\mu\text{M}$ , [**1d**]: 1, 2, 4, 10, 18, and 26  $\mu\text{M}$ ; ethidium bromide (■): [CT-DNA] = 300  $\mu\text{M}$ , [ethidium bromide] = 4, 26, 70, 113, 160, and 200  $\mu\text{M}$ ; netropsin (◆): [CT-DNA] = 300  $\mu\text{M}$ , [netropsin] = 4, 26, 70, 113, 160, and 200  $\mu\text{M}$ .

### Affinity of **1d** for M. Luteus DNA

Trial 1  $K_{app}=7.29 \times 10^6 M^{-1}$  ;

Trial 2  $K_{app}=9.50 \times 10^6 M^{-1}$  ;

Trial 3  $K_{app}=6.00 \times 10^6 M^{-1}$  ;

**Average  $K_{app}=7.36(\pm 1.40) \times 10^6 M^{-1}$**

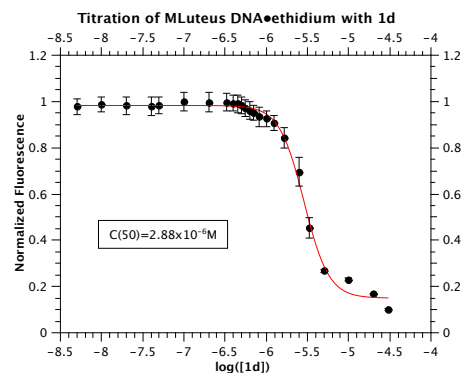

### Affinity of **1d** for poly(dA•dT)<sub>2</sub>

Trial 1  $K_{app}=1.71 \times 10^7 M^{-1}$  ;

Trial 2  $K_{app}=2.00 \times 10^7 M^{-1}$  ;

Trial 3  $K_{app}=1.60 \times 10^7 M^{-1}$

**Average  $K_{app}=17.7 \pm 1.5 \times 10^6 M^{-1}$**

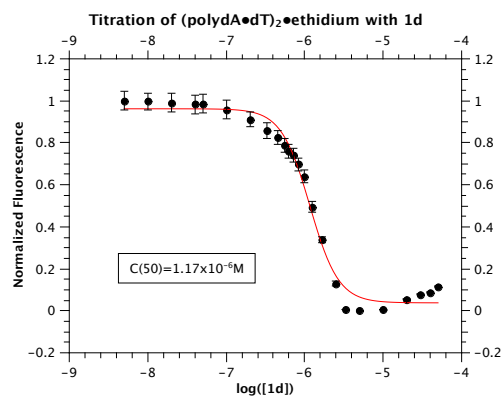

### Affinity of **1d** for polydG•polydC

Trial 1:  $K_{app}=18.9 \times 10^6 M^{-1}$

Trial 2:  $K_{app}=18.8 \times 10^6 M^{-1}$

Trial 3:  $K_{app}=17.5 \times 10^6 M^{-1}$

**Average  $K_{app}=18.4 \pm 0.64 \times 10^6 M^{-1}$**

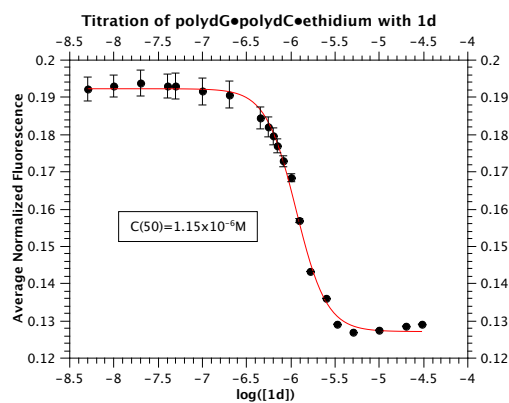

### Affinity of **1d** for Lambda Phage DNA

Trial 1:  $K_{app}=9.05 \times 10^6 M^{-1}$

Trial 2:  $K_{app}=8.05 \times 10^6 M^{-1}$

Trial 3:  $K_{app}=6.95 \times 10^6 M^{-1}$

**Average  $K_{app}=8.02 \pm 0.71 \times 10^6 M^{-1}$**

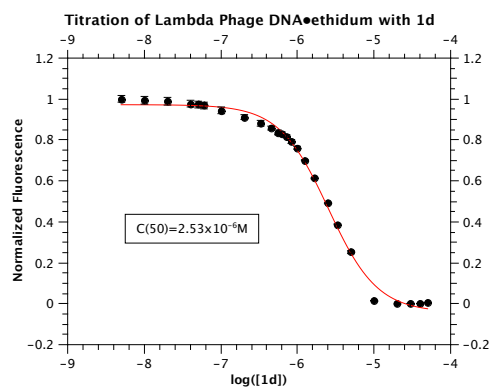

### Affinity of **1d** for polydA•polydT

Trial 1:  $K_{app}=20.2 \times 10^6 M^{-1}$

Trial 2:  $K_{app}=16.0 \times 10^6 M^{-1}$

Trial 3:  $K_{app}=23.4 \times 10^6 M^{-1}$

**Average  $K_{app}=20.0 \pm 2.5 \times 10^6 M^{-1}$**

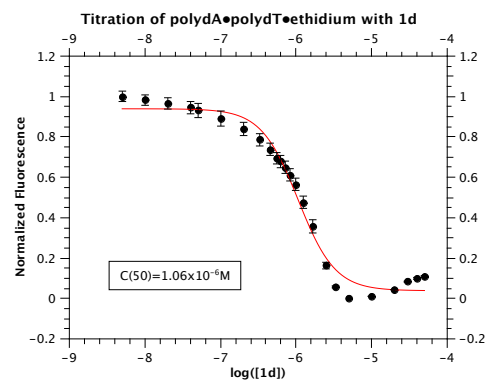

### Affinity of netropsin for lambda phage DNA

Trial 1:  $K_{app}=4.18 \times 10^5 M^{-1}$

Trial 2:  $K_{app}=3.57 \times 10^5 M^{-1}$

Trial 3:  $K_{app}=3.63 \times 10^5 M^{-1}$

**Average  $K_{app}=3.79 \pm 0.26 \times 10^5 M^{-1}$**

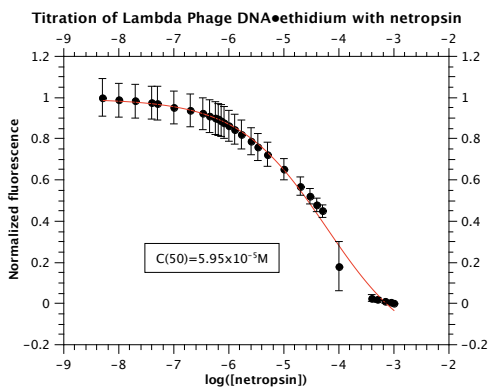

Affinity of netropsin for CT DNA

Trial 1:  $K_{app}=3.30 \times 10^5 M^{-1}$

Trial 2:  $K_{app}=1.80 \times 10^5 M^{-1}$

Trial 3:  $K_{app}=1.24 \times 10^5 M^{-1}$

**Average  $K_{app}=2.11 \pm 0.79 \times 10^5 M^{-1}$**

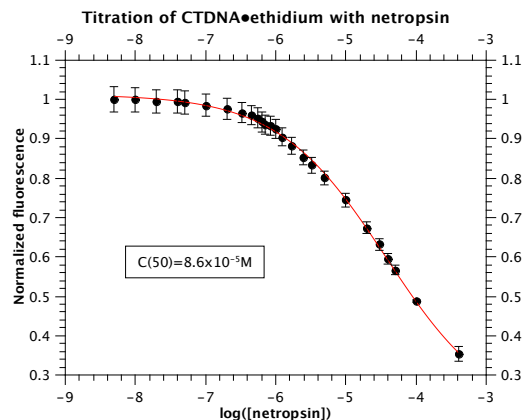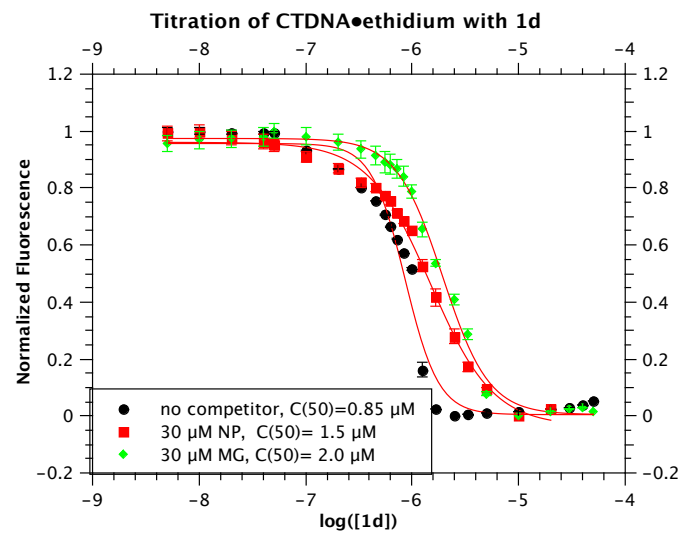

**No competitor,  $K_o=2.47 \pm 1.5 \times 10^7 M^{-1}$ ; 30  $\mu M$  NP,  $K_o=1.40 \pm 1.2 \times 10^7 M^{-1}$ ; 30  $\mu M$  MG,  $1.05 \pm 0.9 \times 10^7 M^{-1}$**

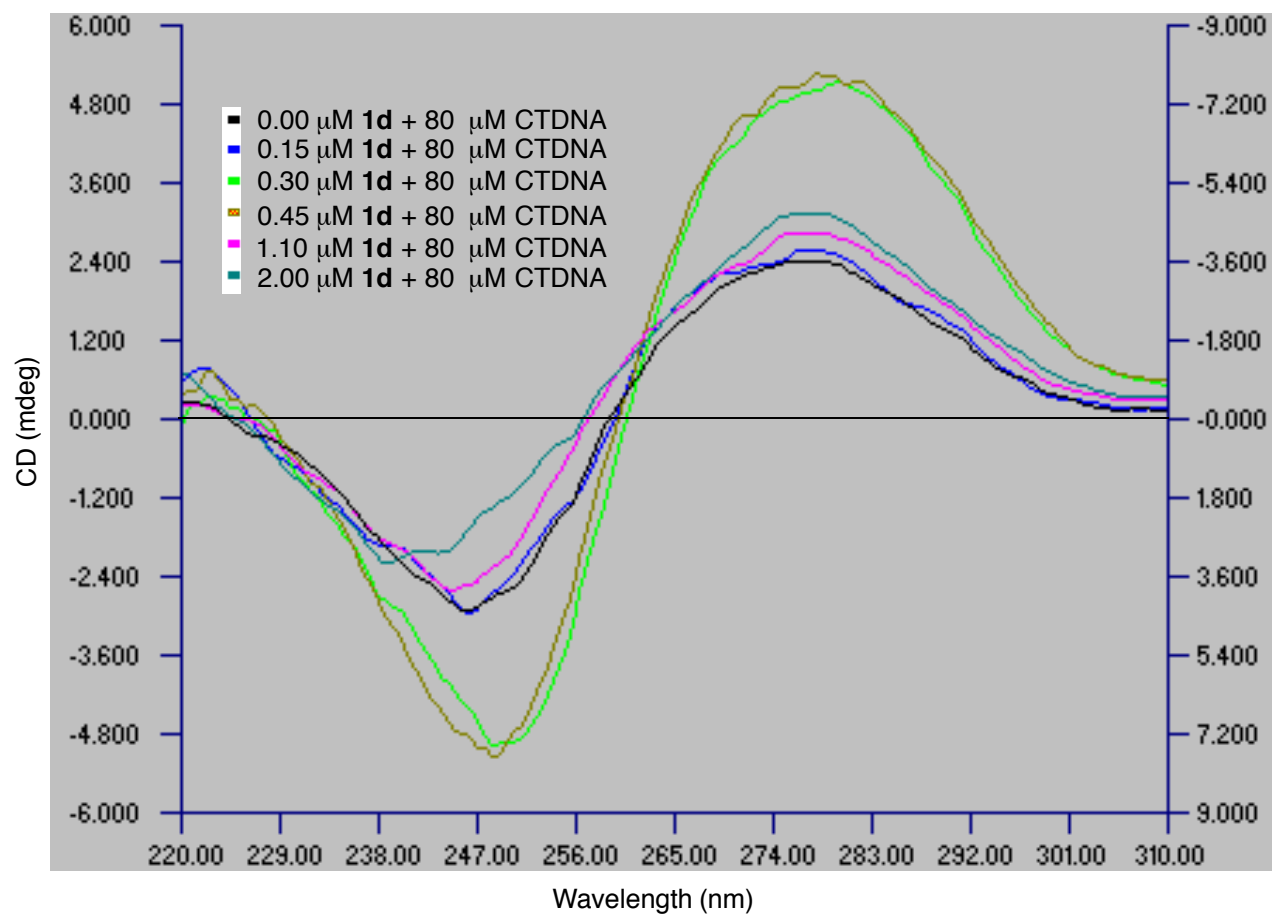

**Figure 5.** The 220-310 nm region of the CD spectrum of solutions of CT DNA (80 μM) in the absence (black line) and presence of various concentrations of **1d**: blue line, 0.15 μM **1d**; light green line, 0.30 μM **1d**; orange line, 0.45 μM **1d**; red line, 1.1 μM **1d**; dark green line 2.00 μM **1d**



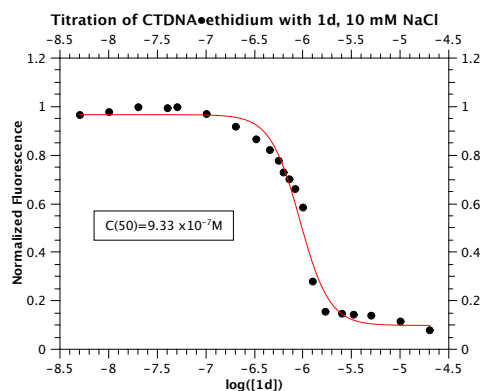

10mM NaCl:  $K_{app} = 2.25 \times 10^7 \text{M}^{-1}$

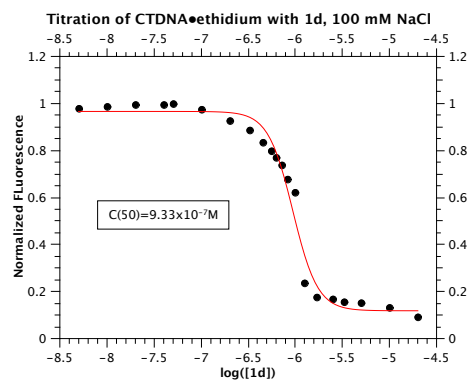

100mM NaCl:  $K_{app} = 2.25 \times 10^7 \text{M}^{-1}$

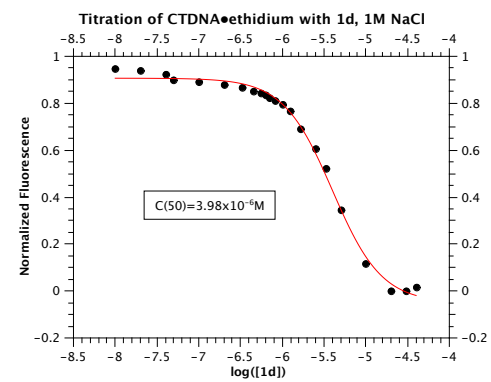

1M NaCl:  $K_{app} = 5.30 \times 10^6 \text{M}^{-1}$

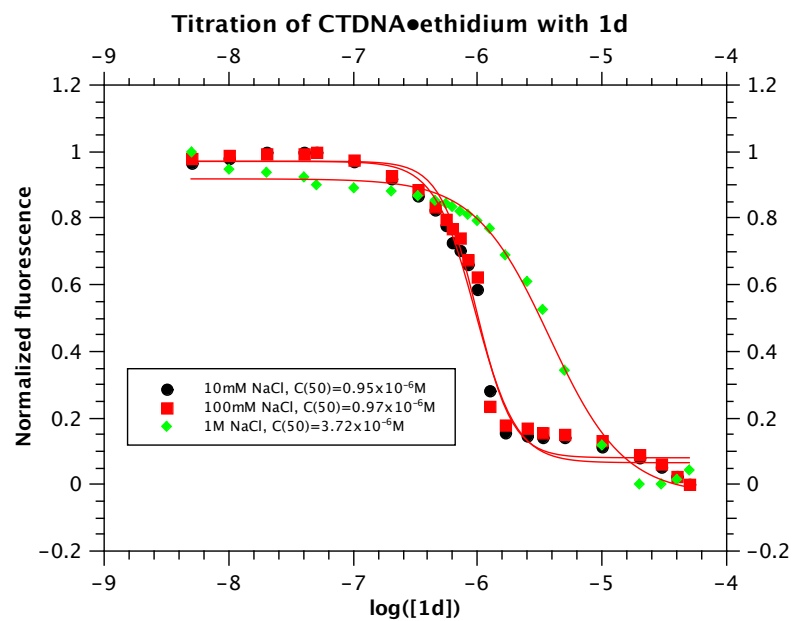

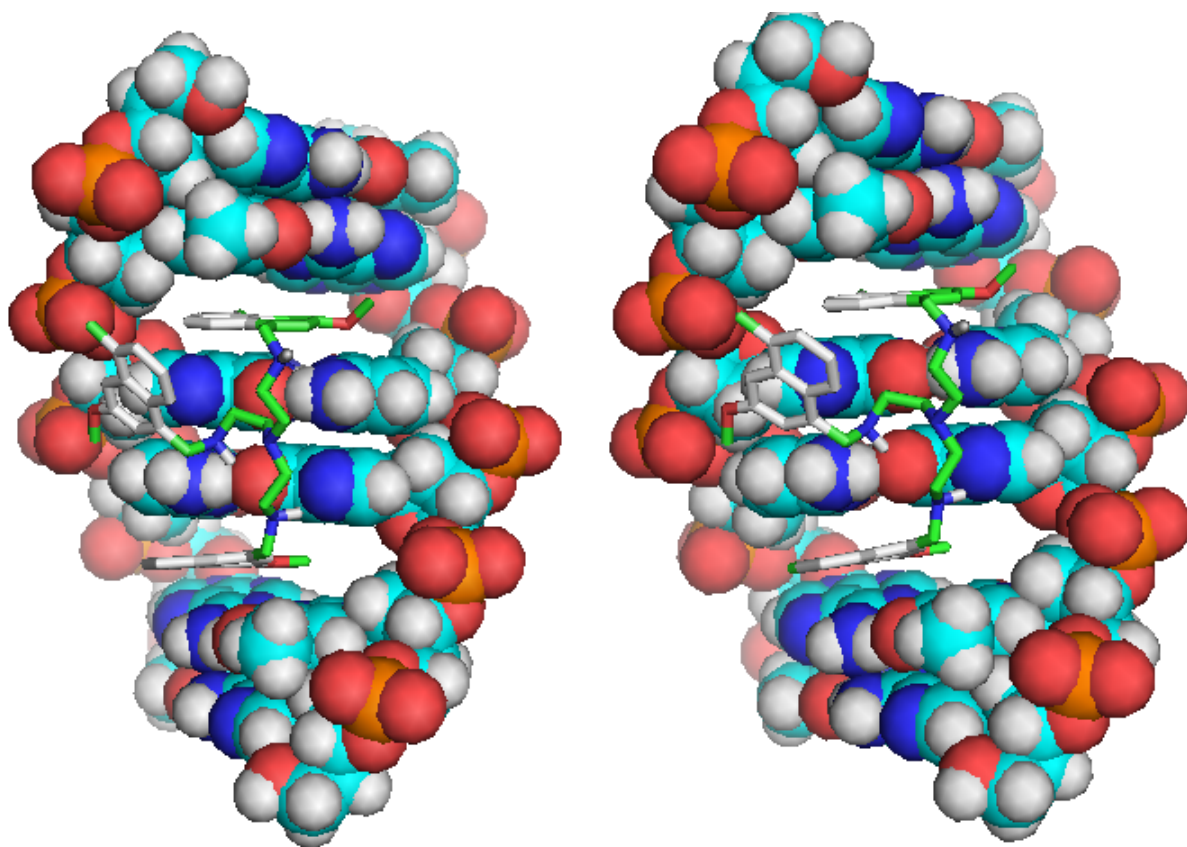

**Model for bis-intercalation of ligand 1d in the major groove of DNA sequence 5'-ATGCAT-3',  
generated by Autodock Vina using DNA (PDB 1x95) and 1d minimized by Spartan 14 for Macintosh**

Additional binding modes for the association of 1d with DNA sequence 5'-ATGCAT-3',  
generated by Autodock Vina using DNA (PDB 1x95) and 1d minimized by Spartan 14 for Macintosh

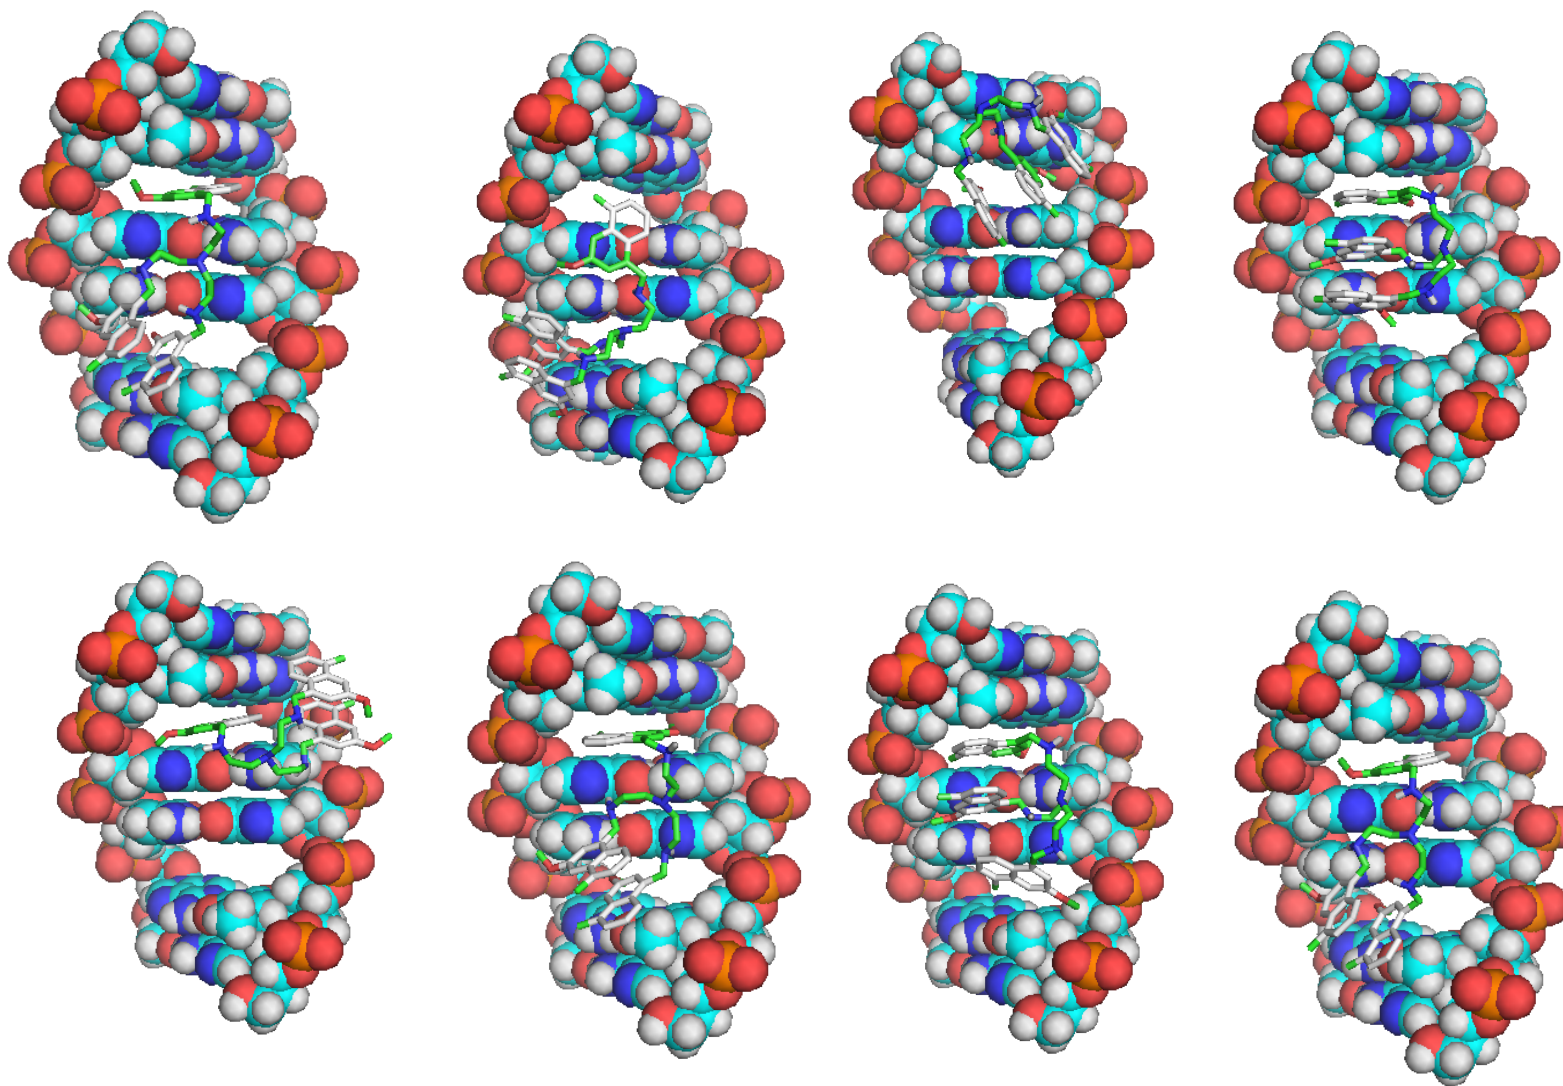

**Compound 2a Ethidium displacement studies;  $K_{app}=2.1 \times 10^6 M^{-1} \times 5/C50$**

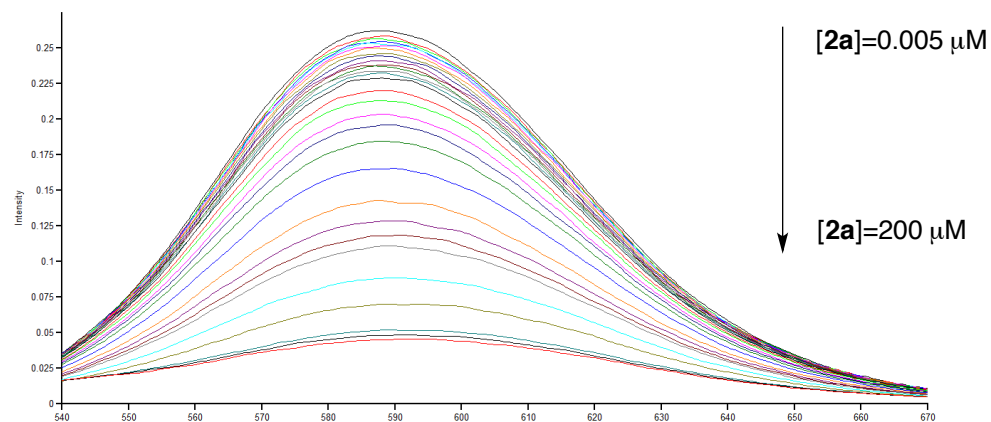

Titration of CT DNA (10  $\mu M$ ) and ethidium (10  $\mu M$ ) with **3b**: 0.005, 0.01, 0.02, 0.04, 0.05, 0.1, 0.2, 0.33, 0.45, 0.56, 0.63, 0.71, 0.83, 1.00, 1.25, 1.67, 2.50, 3.30, 5.0, 10.0, 20.0, 30.0, 40.0, 50.0, 60.0, 100.0, 200.0  $\mu M$

Trial 1:  $K_{app}=4.36 \times 10^5 M^{-1}$ ; Trial 2:  $K_{app}=5.0 \times 10^5 M^{-1}$ ; Trial 3:  $K_{app}=4.79 \times 10^5 M^{-1}$

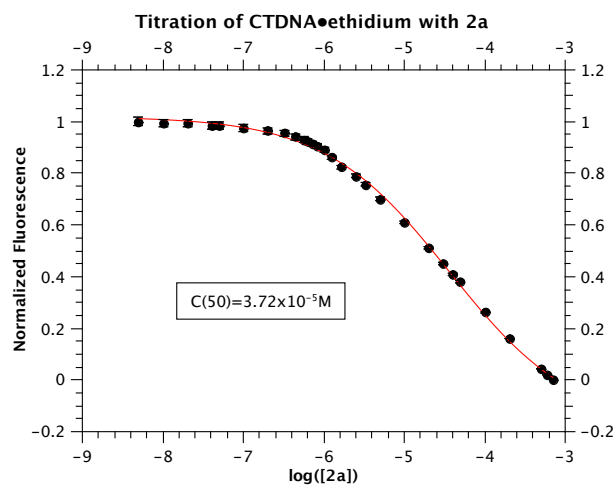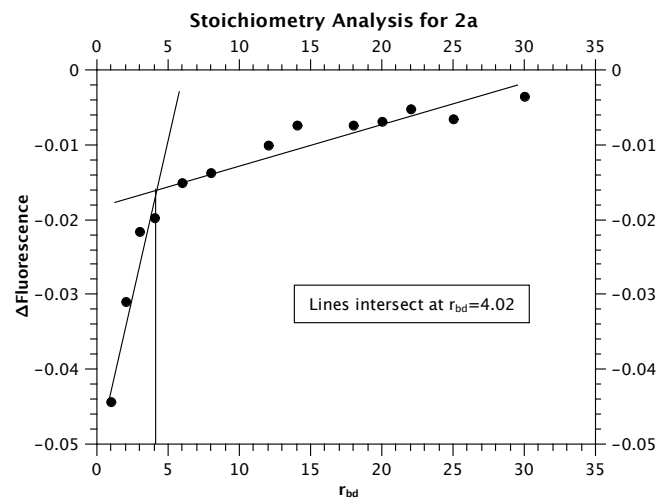

3 trials: Average  $K_{app}=4.72 \pm 0.27 \times 10^5 M^{-1}$

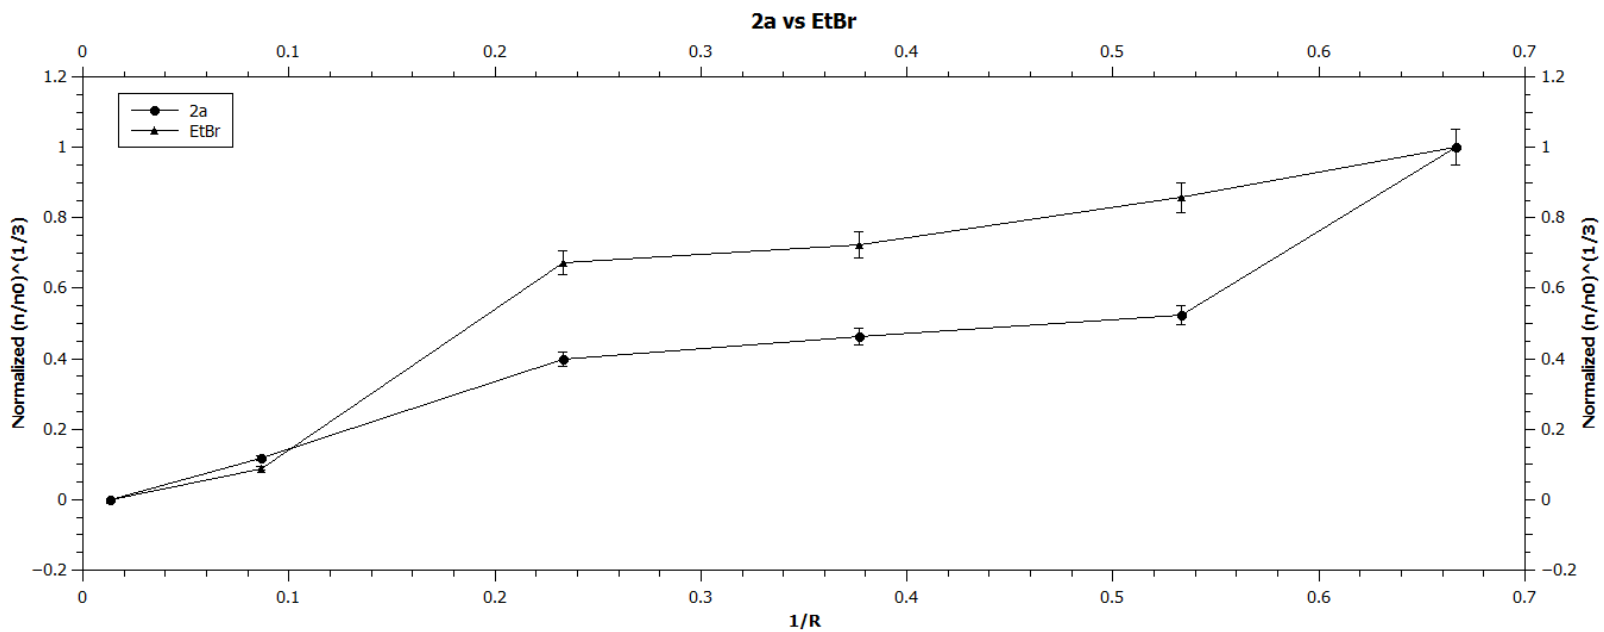

Effect of increasing amount of EtBr ( $\blacktriangle$ ) and **2a** ( $\bullet$ ) on relative viscosity of CT-DNA. EtBr ( $\blacktriangle$ ): [CT-DNA] = 300  $\mu$ M, [EtBr]= 4, 26, 70, 113, 160, and 200  $\mu$ M; **2a** ( $\bullet$ ): [CT-DNA] = 300  $\mu$ M, [**2a**]: 1, 2, 4, 10, 18, and 26  $\mu$ M.

**Compound 3b Ethidium displacement studies;  $K_{app}=2.1 \times 10^6 M^{-1} \times 10/C50$**

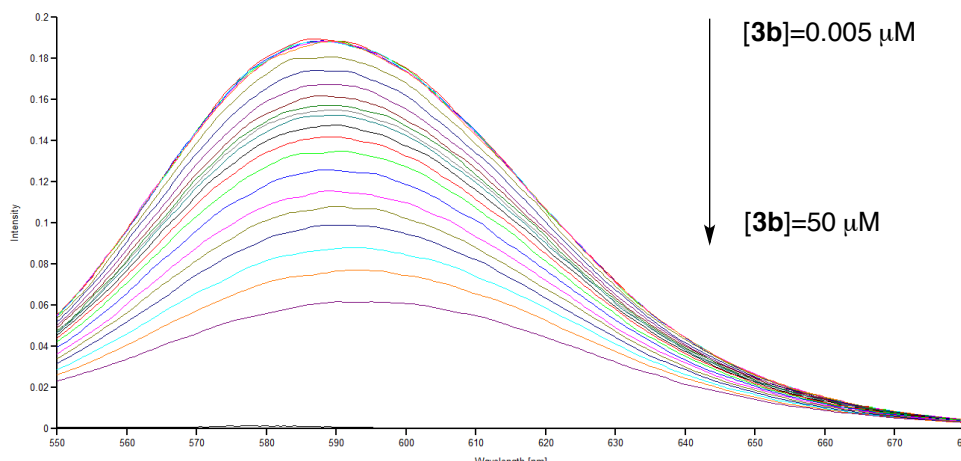

Titration of CT DNA (10  $\mu\text{M}$ ) and ethidium (10  $\mu\text{M}$ ) with **3b**: 0.005, 0.01, 0.02, 0.04, 0.05, 0.1, 0.2, 0.33, 0.45, 0.56, 0.63, 0.71, 0.83, 1.00, 1.25, 1.67, 2.50, 3.30, 5.0, 10.0, 20.0, 50.0  $\mu\text{M}$

Trial 1:  $K_{app}=6.88 \times 10^6 M^{-1}$ ; Trial 2:  $K_{app}=6.99 \times 10^6 M^{-1}$ ; Trial 3:  $K_{app}=5.55 \times 10^6 M^{-1}$

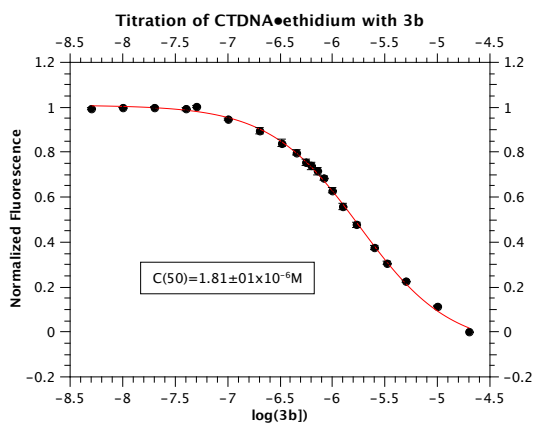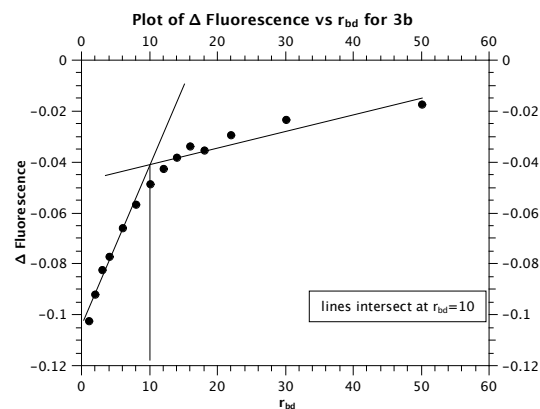

3 trials: Average  $K_{app}=6.47 \pm 0.65 \times 10^6 M^{-1}$

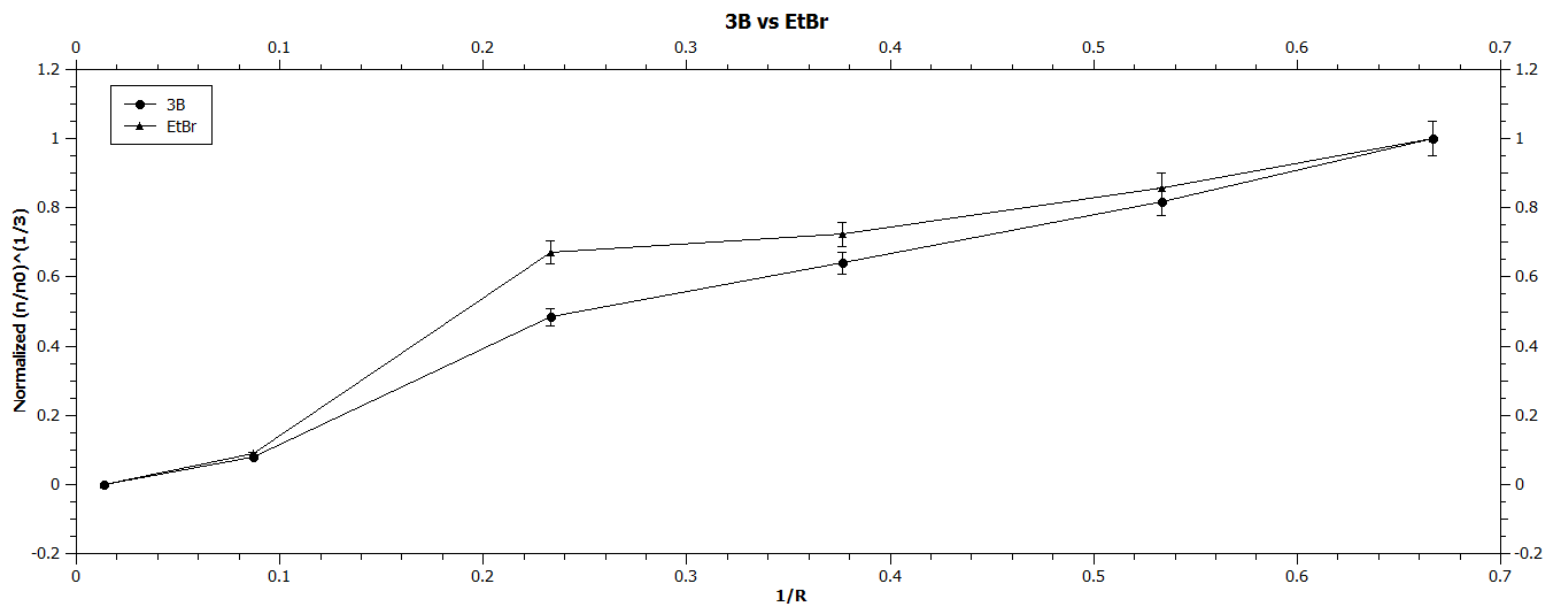

Effect of increasing amount of EtBr ( $\blacktriangle$ ) and **3b** ( $\bullet$ ) on relative viscosity of CT-DNA. EtBr ( $\blacktriangle$ ): [CT-DNA] = 300  $\mu$ M, [EtBr] = 4, 26, 70, 113, 160, and 200  $\mu$ M; **3b** ( $\bullet$ ): [CT-DNA] = 300  $\mu$ M, [**3b**] = 1, 2, 4, 10, 18, and 26  $\mu$ M.
